# Supplementary material for: Surgical procedures and postsurgical tissue processing significantly affect expression of genes and EGFR-pathway proteins in colorectal cancer tissue
Source: PubMed Central journal article supplement (PMC4294341; doi:10.18632/oncotarget.2669), 2014-11-03
Supplement: oncotarget-05-11017-s001.pdf [file oncotarget-05-11017-s001.pdf]

# Surgical procedures and postsurgical tissue processing significantly affect expression of genes and EGFR-pathway proteins in colorectal cancer tissue

## Supplementary Material

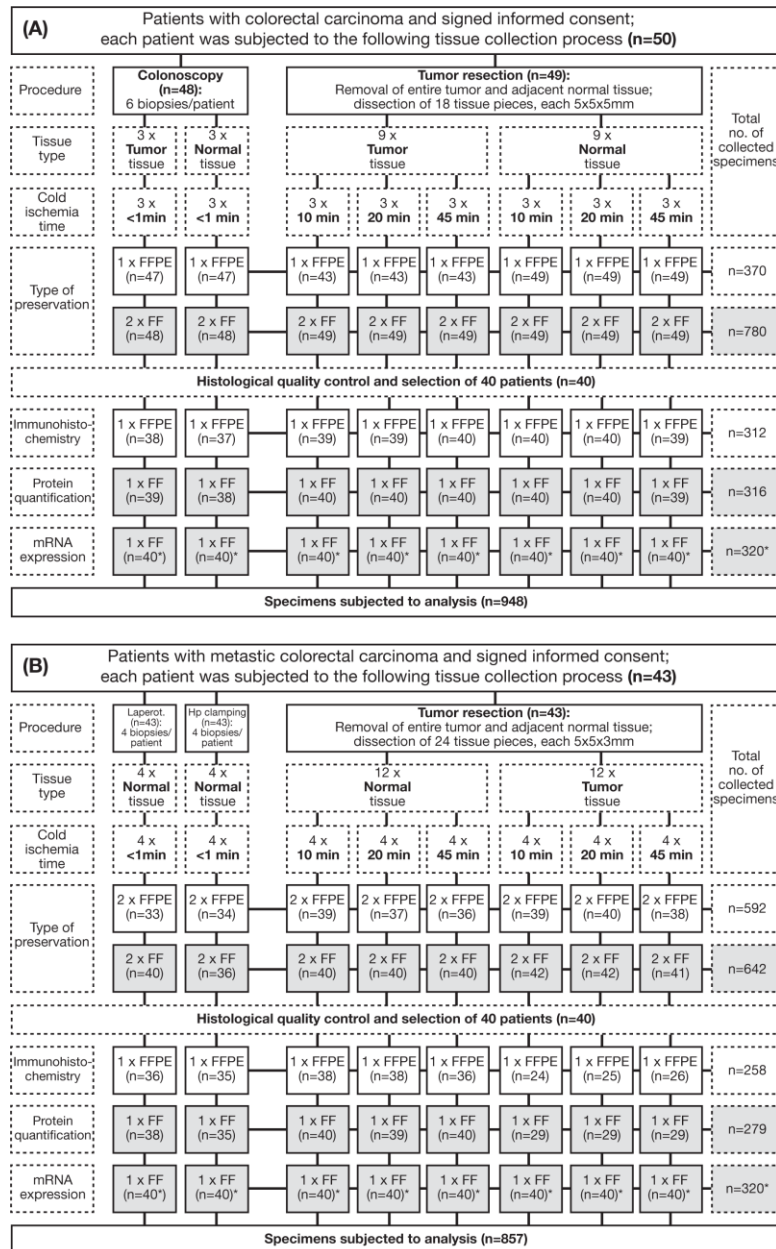

\*analyses were conducted with duplicate samples

**Supplementary Figure 1: Flow chart of patient enrollment and tissue collection.** Patients had: **(A)** primary colorectal cancer; and **(B)** metastasized colorectal cancer. Some patients with metastasized cancer had hepatic pedicle clamping (H.p.). Tissue preservation methods were: frozen in liquid nitrogen (FF) or formalin-fixed paraffin-embedded (FFPE).

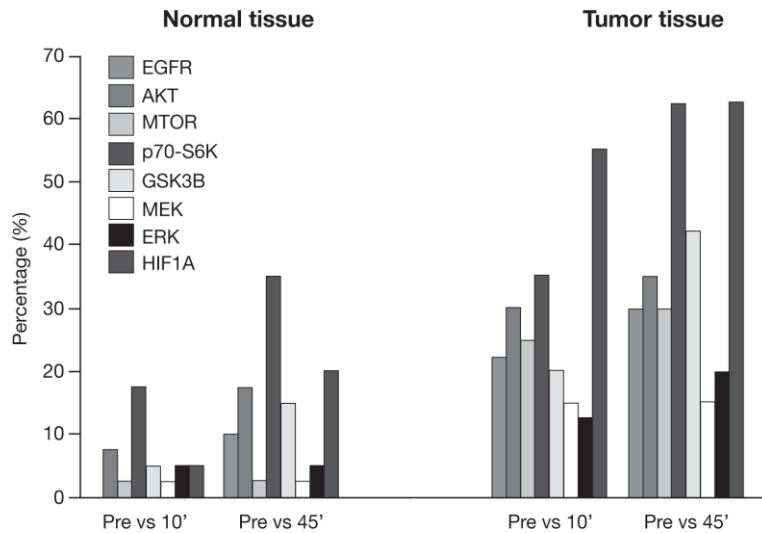

**Supplementary Figure 2a: Protein expression in colon tissue.** The figure shows changes of more than 2-fold in total protein expression of selected proteins, measured in normal colon and colorectal cancer tissue. Protein expression changes were compared: pre, before hepatic pedicle clamping; 10', 10 minutes after resection; and 45', 45 minutes after resection.

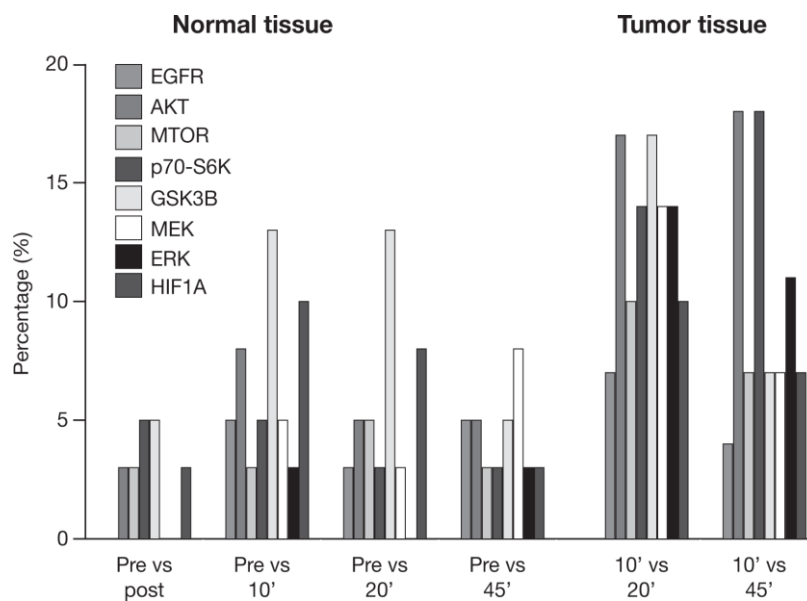

**Supplementary Figure 2b: Protein expression in liver tissue.** The figure shows changes of more than 2-fold in total protein expression of selected proteins, measured in normal hepatic and metastatic tissue. Protein expression changes were compared: pre, before hepatic pedicle clamping; post, after clamping; 10', 10 minutes after resection; 20', 20 minutes after resection; and 45', 45 minutes after resection.

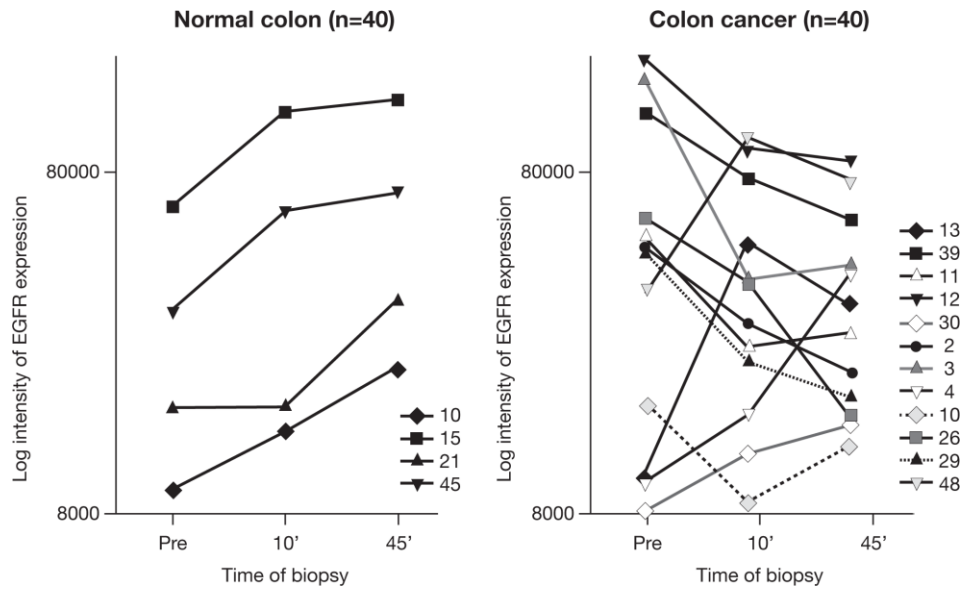

**Supplementary Figure 3:** Expression of EGFR in normal colon (left) and tumor tissue (right) in a subgroup of patients who showed at least 2-fold change in protein expression (up- or down-regulated) as determined by analyzing tissue lysates using MSD technology.

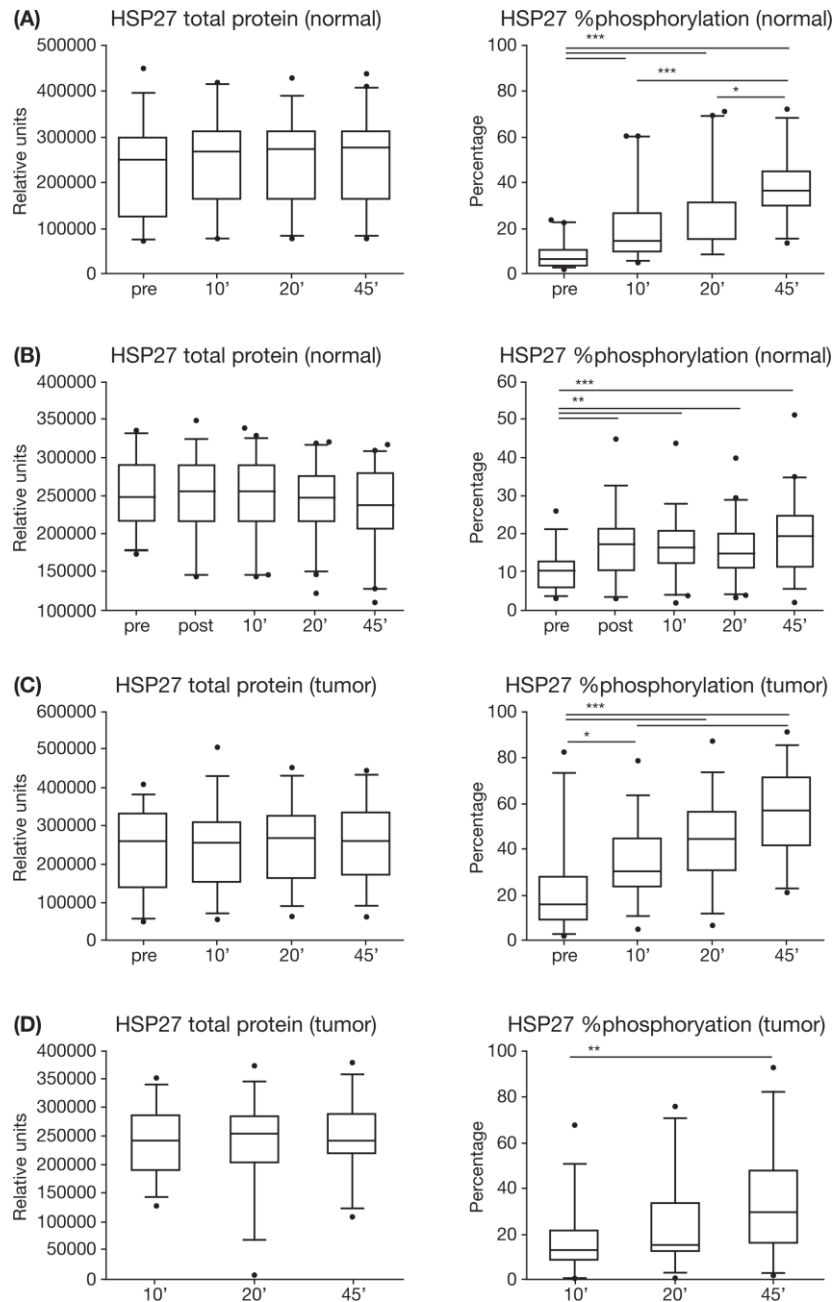

**Supplementary Figure 4:** Total protein expression (relative units) and percentage phosphorylation for HSP27 in: (A) normal colon; (B) liver; (C) primary colon cancer; and (D) metastatic liver lesion tissue. Tissue was obtained: pre, before hepatic pedicle clamping; post, after clamping; 10', 10 minutes after resection; 20', 20 minutes after resection; and 45', 45 minutes after resection. \* $p < 0.05$ ; \*\* $p < 0.01$ ; \*\*\* $p < 0.001$ .

**Supplementary Table 1:** Differentially expressed genes in normal colon tissue according to when tissue was obtained. P-values represent the comparison between tissue obtained presurgery and 10 minutes after resection; the 70 regulated genes with  $\geq 2$ -fold (statistically significant) change in expression are listed.

| Probe ID     | Gene             | Protein                                         | p-value     | Proportional change |
|--------------|------------------|-------------------------------------------------|-------------|---------------------|
| 1555847_a_at | <i>LOC284454</i> | Hypothetical LOC284454                          | 9.54667E-12 | 2.50                |
| 1555938_x_at | <i>VIM</i>       | Vimentin                                        | 3.70146E-11 | 2.65                |
| 1557285_at   | <i>AREGB</i>     | Amphiregulin B                                  | 4.38611E-07 | 2.53                |
| 1564796_at   | <i>EMPI</i>      | Epithelial membrane protein 1                   | 1.96927E-10 | 2.84                |
| 201041_s_at  | <i>DUSP1</i>     | Dual specificity phosphatase 1                  | 1.20966E-17 | 3.60                |
| 201289_at    | <i>CYR61</i>     | Cysteine-rich, angiogenic inducer, 61           | 1.56579E-18 | 5.62                |
| 201631_s_at  | <i>IER3</i>      | Immediate early response 3                      | 1.52502E-06 | 2.02                |
| 201693_s_at  | <i>EGR1</i>      | Early growth response 1                         | 5.45124E-09 | 2.39                |
| 201694_s_at  | <i>EGR1</i>      | Early growth response 1                         | 1.92369E-12 | 4.06                |
| 201739_at    | <i>SGKI</i>      | Serum/glucocorticoid regulated kinase 1         | 4.02631E-14 | 4.27                |
| 201893_x_at  | <i>DCN</i>       | Decorin                                         | 4.24098E-10 | 2.07                |
| 202291_s_at  | <i>MGP</i>       | Matrix GLA protein                              | 3.32429E-08 | 3.16                |
| 202672_s_at  | <i>ATF3</i>      | Activating transcription factor 3               | 1.29365E-12 | 3.82                |
| 202988_s_at  | <i>RGS1</i>      | Regulator of G-protein signaling 1              | 4.20768E-21 | 5.07                |
| 203821_at    | <i>HBEGF</i>     | Heparin-binding EGF-like growth factor          | 1.92717E-10 | 3.35                |
| 204622_x_at  | <i>NR4A2</i>     | Nuclear receptor subfamily 4, group A, member 2 | 1.66002E-09 | 3.82                |
| 205200_at    | <i>CLEC3B</i>    | C-type lectin domain family 3, member B         | 1.65903E-11 | 2.38                |
| 205239_at    | <i>AREG</i>      | Amphiregulin                                    | 9.33122E-10 | 3.01                |
| 205382_s_at  | <i>CFD</i>       | Complement factor D (adipsin)                   | 1.38175E-09 | 2.14                |
| 205440_s_at  | <i>NPY1R</i>     | Neuropeptide Y receptor Y1                      | 6.18072E-10 | 2.17                |
| 206577_at    | <i>VIP</i>       | Vasoactive intestinal peptide                   | 1.27434E-05 | 2.41                |
| 208078_s_at  | <i>SIK1</i>      | Salt-inducible kinase 1                         | 8.60542E-09 | 3.15                |
| 208763_s_at  | <i>TSC22D3</i>   | TSC22 domain family, member 3                   | 1.07833E-11 | 2.33                |
| 209101_at    | <i>CTGF</i>      | Connective tissue growth factor                 | 7.37383E-16 | 3.06                |
| 209189_at    | <i>FOS</i>       | FBJ murine osteosarcoma viral oncogene homolog  | 1.26409E-18 | 6.81                |
| 209335_at    | <i>DCN</i>       | Decorin                                         | 1.20046E-10 | 2.34                |
| 210764_s_at  | <i>CYR61</i>     | Cysteine-rich, angiogenic inducer, 61           | 5.62682E-15 | 3.56                |
| 211896_s_at  | <i>DCN</i>       | Decorin                                         | 1.3672E-09  | 2.33                |
| 212225_at    | <i>EIF1</i>      | Eukaryotic translation initiation factor 1      | 3.33258E-14 | 2.06                |
| 212977_at    | <i>CXCR7</i>     | Chemokine (C-X-C motif) receptor 7              | 4.73779E-10 | 2.05                |
| 213068_at    | <i>DPT</i>       | Dermatopontin                                   | 7.0909E-10  | 2.52                |
| 214038_at    | <i>CCL8</i>      | Chemokine (C-C motif) ligand 8                  | 5.52415E-14 | 2.84                |
| 216248_s_at  | <i>NR4A2</i>     | Nuclear receptor subfamily 4, group A, member 2 | 8.88079E-09 | 3.80                |
| 216834_at    | <i>RGS1</i>      | Regulator of G-protein signaling 1              | 1.65149E-22 | 5.04                |
| 218541_s_at  | <i>C8orf4</i>    | Chromosome 8 open reading frame 4               | 2.39257E-12 | 4.00                |
| 218730_s_at  | <i>OGN</i>       | Osteoglycin                                     | 1.11377E-08 | 2.36                |
| 219087_at    | <i>ASPN</i>      | Asporin                                         | 1.46805E-10 | 2.03                |

| Probe ID     | Gene            | Protein                                                          | p-value     | Proportional change |
|--------------|-----------------|------------------------------------------------------------------|-------------|---------------------|
| 219230_at    | <i>TMEM100</i>  | Transmembrane protein 100                                        | 2.2327E-14  | 2.15                |
| 219295_s_at  | <i>PCOLCE2</i>  | Procollagen C-endopeptidase enhancer 2                           | 3.16146E-08 | 2.13                |
| 220468_at    | <i>ARL14</i>    | ADP-ribosylation factor-like 14                                  | 7.67767E-11 | 2.10                |
| 222162_s_at  | <i>ADAMTS1</i>  | ADAM metalloproteinase with thrombospondin type 1 motif, 1       | 4.62579E-11 | 2.54                |
| 222722_at    | <i>OGN</i>      | Osteoglycin                                                      | 1.34695E-08 | 2.79                |
| 223121_s_at  | <i>SFRP2</i>    | Secreted frizzled-related protein 2                              | 1.04636E-08 | 2.18                |
| 223122_s_at  | <i>SFRP2</i>    | Secreted frizzled-related protein 2                              | 1.07874E-09 | 3.21                |
| 224657_at    | <i>ERRFI1</i>   | ERBB receptor feedback inhibitor 1                               | 7.42432E-10 | 2.09                |
| 227099_s_at  | <i>C11orf96</i> | Chromosome 11 open reading frame 96                              | 7.20862E-12 | 3.09                |
| 227404_s_at  | <i>EGR1</i>     | Early growth response 1                                          | 1.39748E-10 | 3.94                |
| 227697_at    | <i>SOCS3</i>    | Suppressor of cytokine signaling 3                               | 0.000387697 | 2.15                |
| 228335_at    | <i>CLDN11</i>   | Claudin 11                                                       | 1.03247E-10 | 2.32                |
| 230494_at    | ---             | ---                                                              | 2.71373E-11 | 2.40                |
| 243509_at    | ---             | ---                                                              | 5.3854E-16  | 2.13                |
| 36711_at     | <i>MAFF</i>     | V-maf musculoaponeurotic fibrosarcoma oncogene homolog F (avian) | 1.6224E-09  | 2.66                |
| 38037_at     | <i>HBEGF</i>    | Heparin-binding EGF-like growth factor                           | 2.60564E-09 | 2.50                |
| 1554436_a_at | <i>REG4</i>     | Regenerating islet-derived family, member 4                      | 0.000125463 | -2.88               |
| 203649_s_at  | <i>PLA2G2A</i>  | Phospholipase A2, group IIA (platelets, synovial fluid)          | 5.92788E-06 | -2.42               |
| 205844_at    | <i>VNN1</i>     | Vanin 1                                                          | 0.000102012 | -3.07               |
| 207214_at    | <i>SPINK4</i>   | Serine peptidase inhibitor, Kazal type 4                         | 0.000340689 | -2.75               |
| 207397_s_at  | <i>HOXD13</i>   | Homeobox D13                                                     | 9.4269E-08  | -2.95               |
| 212531_at    | <i>LCN2</i>     | Lipocalin 2                                                      | 1.15271E-06 | -2.68               |
| 212768_s_at  | <i>OLFM4</i>    | Olfactomedin 4                                                   | 0.003466089 | -2.27               |
| 214604_at    | <i>HOXD11</i>   | Homeobox D11                                                     | 4.34958E-09 | -2.12               |
| 219727_at    | <i>DUOX2</i>    | Dual oxidase 2                                                   | 3.35786E-08 | -3.69               |
| 219795_at    | <i>SLC6A14</i>  | Solute carrier family 6 (amino acid transporter), member 14      | 1.0087E-05  | -3.66               |
| 221091_at    | <i>INSL5</i>    | Insulin-like 5                                                   | 5.07532E-05 | -2.69               |
| 223447_at    | <i>REG4</i>     | Regenerating islet-derived family, member 4                      | 0.000132695 | -2.50               |
| 228592_at    | <i>MS4A1</i>    | Membrane-spanning 4-domains, subfamily A, member 1               | 0.000474385 | -2.21               |
| 229152_at    | <i>C4orf7</i>   | Chromosome 4 open reading frame 7                                | 0.001397357 | -2.49               |
| 229400_at    | <i>HOXD10</i>   | Homeobox D10                                                     | 8.95393E-08 | -2.89               |
| 236681_at    | <i>HOXD13</i>   | Homeobox D13                                                     | 5.02826E-08 | -2.05               |
| 238847_at    | ---             | ---                                                              | 4.27233E-08 | -2.94               |

**Supplementary Table 2:** Differentially expressed genes in normal colon tissue according to a comparison of timepoint. P-values represent the comparison between tissue obtained presurgery and 10 minutes after resection; the 96 regulated genes with  $\geq 2$ -fold (statistically significant) change in expression are listed.

| Probe ID     | Gene             | Protein                                         | p-value     | Proportional change |
|--------------|------------------|-------------------------------------------------|-------------|---------------------|
| 1552296_at   | <i>BEST4</i>     | Bestrophin 4                                    | 1.28199E-06 | 2.09                |
| 1555847_a_at | <i>LOC284454</i> | Hypothetical LOC284454                          | 1.49773E-14 | 2.17                |
| 1555938_x_at | <i>VIM</i>       | Vimentin                                        | 1.98675E-18 | 2.53                |
| 1557285_at   | <i>AREGB</i>     | Amphiregulin B                                  | 6.55772E-09 | 2.35                |
| 1564796_at   | <i>EMPI</i>      | Epithelial membrane protein 1                   | 7.68089E-17 | 3.82                |
| 201041_s_at  | <i>DUSP1</i>     | Dual specificity phosphatase 1                  | 2.99931E-23 | 4.45                |
| 201289_at    | <i>CYR61</i>     | Cysteine-rich, angiogenic inducer, 61           | 2.83776E-22 | 5.86                |
| 201324_at    | <i>EMPI</i>      | Epithelial membrane protein 1                   | 9.86918E-12 | 2.09                |
| 201325_s_at  | <i>EMPI</i>      | Epithelial membrane protein 1                   | 1.90042E-11 | 2.09                |
| 201465_s_at  | <i>JUN</i>       | Jun proto-oncogene                              | 6.16667E-17 | 2.02                |
| 201466_s_at  | <i>JUN</i>       | Jun proto-oncogene                              | 4.02899E-21 | 2.43                |
| 201631_s_at  | <i>IER3</i>      | Immediate early response 3                      | 1.04871E-08 | 2.03                |
| 201693_s_at  | <i>EGR1</i>      | Early growth response 1                         | 1.42355E-12 | 2.60                |
| 201694_s_at  | <i>EGR1</i>      | Early growth response 1                         | 1.79272E-18 | 4.78                |
| 201739_at    | <i>SGKI</i>      | Serum/glucocorticoid regulated kinase 1         | 2.74262E-16 | 4.62                |
| 201893_x_at  | <i>DCN</i>       | Decorin                                         | 2.54325E-11 | 2.21                |
| 202068_s_at  | <i>LDLR</i>      | Low density lipoprotein receptor                | 1.13748E-08 | 2.06                |
| 202241_at    | <i>TRIB1</i>     | Tribbles homolog 1 (Drosophila)                 | 1.49548E-14 | 2.00                |
| 202291_s_at  | <i>MGP</i>       | Matrix GLA protein                              | 4.90017E-09 | 3.44                |
| 202672_s_at  | <i>ATF3</i>      | Activating transcription factor 3               | 7.34522E-15 | 3.76                |
| 202988_s_at  | <i>RGS1</i>      | Regulator of G-protein signaling 1              | 5.04504E-25 | 5.24                |
| 202995_s_at  | <i>FBLN1</i>     | Fibulin 1                                       | 6.17794E-08 | 2.02                |
| 203821_at    | <i>HBEGF</i>     | Heparin-binding EGF-like growth factor          | 4.06679E-13 | 3.31                |
| 203851_at    | <i>IGFBP6</i>    | Insulin-like growth factor binding protein 6    | 2.56813E-12 | 2.00                |
| 204622_x_at  | <i>NR4A2</i>     | Nuclear receptor subfamily 4, group A, member 2 | 1.23506E-10 | 3.38                |
| 204955_at    | <i>SRPX</i>      | Sushi-repeat-containing protein, X-linked       | 4.15751E-09 | 2.10                |
| 205200_at    | <i>CLEC3B</i>    | C-type lectin domain family 3, member B         | 2.07874E-12 | 2.49                |
| 205239_at    | <i>AREG</i>      | Amphiregulin                                    | 4.65456E-10 | 2.78                |
| 205382_s_at  | <i>CFD</i>       | Complement factor D (adipsin)                   | 4.48062E-10 | 2.18                |
| 205440_s_at  | <i>NPY1R</i>     | Neuropeptide Y receptor Y1                      | 7.56685E-12 | 2.41                |
| 205799_s_at  | <i>SLC3A1</i>    | Solute carrier family 3, member 1               | 2.1179E-07  | 2.25                |
| 206577_at    | <i>VIP</i>       | Vasoactive intestinal peptide                   | 7.96108E-06 | 2.47                |
| 207977_s_at  | <i>DPT</i>       | Dermatopontin                                   | 7.55307E-12 | 2.04                |
| 208078_s_at  | <i>SIK1</i>      | Salt-inducible kinase 1                         | 2.81573E-09 | 2.88                |
| 208763_s_at  | <i>TSC22D3</i>   | TSC22 domain family, member 3                   | 1.50914E-14 | 2.33                |
| 209101_at    | <i>CTGF</i>      | Connective tissue growth factor                 | 2.93886E-17 | 3.21                |
| 209189_at    | <i>FOS</i>       | FBJ murine osteosarcoma viral oncogene          | 9.30065E-25 | 9.15                |

| Probe ID     | Gene             | Protein                                                          | p-value     | Proportional change |
|--------------|------------------|------------------------------------------------------------------|-------------|---------------------|
|              |                  | homolog                                                          |             |                     |
| 209335_at    | <i>DCN</i>       | Decorin                                                          | 8.07853E-12 | 2.45                |
| 210472_at    | <i>MT1G</i>      | Metallothionein 1G                                               | 1.31269E-08 | 2.25                |
| 210764_s_at  | <i>CYR61</i>     | Cysteine-rich, angiogenic inducer, 61                            | 1.7157E-19  | 3.80                |
| 211813_x_at  | <i>DCN</i>       | Decorin                                                          | 3.33982E-11 | 2.13                |
| 211896_s_at  | <i>DCN</i>       | Decorin                                                          | 5.66051E-11 | 2.53                |
| 211998_at    | <i>H3F3B</i>     | H3 histone, family 3B (H3.3B)                                    | 2.99953E-23 | 2.20                |
| 212099_at    | <i>RHOB</i>      | Ras homolog gene family, member B                                | 9.0115E-14  | 2.19                |
| 212225_at    | <i>EIF1</i>      | Eukaryotic translation initiation factor 1                       | 3.70056E-19 | 2.60                |
| 212977_at    | <i>CXCR7</i>     | Chemokine (C-X-C motif) receptor 7                               | 3.00534E-13 | 2.13                |
| 213068_at    | <i>DPT</i>       | Dermatopontin                                                    | 1.96475E-11 | 2.81                |
| 213071_at    | <i>DPT</i>       | Dermatopontin                                                    | 1.93102E-10 | 2.04                |
| 214038_at    | <i>CCL8</i>      | Chemokine (C-C motif) ligand 8                                   | 4.23919E-15 | 3.11                |
| 216248_s_at  | <i>NR4A2</i>     | Nuclear receptor subfamily 4, group A, member 2                  | 2.09133E-10 | 3.49                |
| 216834_at    | <i>RGS1</i>      | Regulator of G-protein signaling 1                               | 8.9595E-25  | 5.14                |
| 218541_s_at  | <i>C8orf4</i>    | Chromosome 8 open reading frame 4                                | 3.6358E-15  | 4.03                |
| 218730_s_at  | <i>OGN</i>       | Osteoglycin                                                      | 5.34811E-09 | 2.40                |
| 219087_at    | <i>ASPN</i>      | Asporin                                                          | 5.37941E-11 | 2.08                |
| 219230_at    | <i>TMEM100</i>   | Transmembrane protein 100                                        | 6.16856E-15 | 2.26                |
| 219295_s_at  | <i>PCOLCE2</i>   | Procollagen C-endopeptidase enhancer 2                           | 8.72205E-10 | 2.41                |
| 220037_s_at  | <i>LYVE1</i>     | Lymphatic vessel endothelial hyaluronan receptor 1               | 1.23282E-11 | 2.07                |
| 220468_at    | <i>ARL14</i>     | ADP-ribosylation factor-like 14                                  | 3.09932E-13 | 2.18                |
| 222162_s_at  | <i>ADAMTS1</i>   | ADAM metallopeptidase thrombospondin type 1 motif, 1             | 7.41382E-12 | 2.51                |
| 222722_at    | <i>OGN</i>       | Osteoglycin                                                      | 7.9114E-09  | 2.82                |
| 222943_at    | <i>GBA3</i>      | Glucosidase, beta, acid 3 (cytosolic)                            | 6.3056E-07  | 2.33                |
| 223121_s_at  | <i>SFRP2</i>     | Secreted frizzled-related protein 2                              | 9.25419E-09 | 2.18                |
| 223122_s_at  | <i>SFRP2</i>     | Secreted frizzled-related protein 2                              | 5.51482E-10 | 3.32                |
| 224657_at    | <i>ERRFI1</i>    | ERBB receptor feedback inhibitor 1                               | 1.2124E-12  | 2.12                |
| 225664_at    | <i>COL12A1</i>   | Collagen, type XII, alpha 1                                      | 7.50679E-10 | 2.03                |
| 225767_at    | <i>LOC284801</i> | Hypothetical protein LOC284801                                   | 2.83155E-14 | 2.18                |
| 227099_s_at  | <i>C11orf96</i>  | Chromosome 11 open reading frame 96                              | 1.42997E-16 | 3.18                |
| 227404_s_at  | <i>EGR1</i>      | Early growth response 1                                          | 2.56676E-16 | 5.01                |
| 227697_at    | <i>SOCS3</i>     | Suppressor of cytokine signaling 3                               | 1.39534E-06 | 2.28                |
| 227827_at    | ---              | ---                                                              | 0.000197723 | 2.05                |
| 228335_at    | <i>CLDN11</i>    | Claudin 11                                                       | 5.1725E-11  | 2.41                |
| 228885_at    | <i>MAMDC2</i>    | MAM domain containing 2                                          | 4.88713E-09 | 2.07                |
| 230494_at    | ---              | ---                                                              | 8.58621E-15 | 2.65                |
| 243509_at    | ---              | ---                                                              | 4.91602E-16 | 2.40                |
| 36711_at     | <i>MAFF</i>      | V-maf musculoaponeurotic fibrosarcoma oncogene homolog F (avian) | 1.1619E-10  | 2.57                |
| 38037_at     | <i>HBEGF</i>     | Heparin-binding EGF-like growth factor                           | 3.03719E-12 | 2.46                |
| 1554436_a_at | <i>REG4</i>      | Regenerating islet-derived family, member 4                      | 3.97492E-05 | -3.18               |



| <b>Probe ID</b> | <b>Gene</b>    | <b>Protein</b>                                              | <b>p-value</b> | <b>Proportional change</b> |
|-----------------|----------------|-------------------------------------------------------------|----------------|----------------------------|
| 1558549_s_at    | <i>VNN1</i>    | Vanin 1                                                     | 1.46257E-06    | -2.10                      |
| 203649_s_at     | <i>PLA2G2A</i> | Phospholipase A2, group IIA (platelets, synovial fluid)     | 1.56184E-07    | -2.94                      |
| 205242_at       | <i>CXCL13</i>  | Chemokine (C-X-C motif) ligand 13                           | 0.001696161    | -2.09                      |
| 205844_at       | <i>VNN1</i>    | Vanin 1                                                     | 1.64394E-07    | -4.50                      |
| 207214_at       | <i>SPINK4</i>  | Serine peptidase inhibitor, Kazal type 4                    | 0.00027595     | -2.87                      |
| 207397_s_at     | <i>HOXD13</i>  | Homeobox D13                                                | 5.32093E-11    | -3.44                      |
| 212531_at       | <i>LCN2</i>    | Lipocalin 2                                                 | 7.01758E-09    | -3.24                      |
| 212768_s_at     | <i>OLFM4</i>   | Olfactomedin 4                                              | 0.000639115    | -2.79                      |
| 214604_at       | <i>HOXD11</i>  | Homeobox D11                                                | 1.29845E-11    | -2.32                      |
| 219727_at       | <i>DUOX2</i>   | Dual oxidase 2                                              | 2.23839E-10    | -4.40                      |
| 219795_at       | <i>SLC6A14</i> | Solute carrier family 6 (amino acid transporter), member 14 | 3.60189E-07    | -4.45                      |
| 221091_at       | <i>INSL5</i>   | Insulin-like 5                                              | 3.79746E-07    | -3.25                      |
| 223447_at       | <i>REG4</i>    | Regenerating islet-derived family, member 4                 | 2.84257E-05    | -2.78                      |
| 228592_at       | <i>MS4A1</i>   | Membrane-spanning 4-domains, subfamily A, member 1          | 9.1242E-05     | -2.50                      |
| 229152_at       | <i>C4orf7</i>  | Chromosome 4 open reading frame 7                           | 0.000120605    | -3.02                      |
| 229400_at       | <i>HOXD10</i>  | Homeobox D10                                                | 4.46316E-10    | -3.26                      |
| 236681_at       | <i>HOXD13</i>  | Homeobox D13                                                | 2.53117E-11    | -2.30                      |
| 238847_at       | ---            | ---                                                         | 7.09608E-11    | -3.50                      |
| 238999_at       | ---            | ---                                                         | 7.58656E-17    | -2.04                      |

**Supplementary Table 3:** Differentially expressed genes in colon tumor tissue according to a comparison of timepoint. P-values represent the comparison between tissue obtained presurgery and 10 minutes after resection; the 178 regulated genes with  $\geq 2$ -fold (statistically significant) change in expression are listed.

| Probe ID     | Gene           | Protein                                                                  | p-value     | Proportional change |
|--------------|----------------|--------------------------------------------------------------------------|-------------|---------------------|
| 1555724_s_at | <i>TAGLN</i>   | Transgelin                                                               | 4.73342E-05 | 2.14                |
| 1555938_x_at | <i>VIM</i>     | Vimentin                                                                 | 6.5247E-06  | 2.06                |
| 1568574_x_at | <i>SPP1</i>    | Secreted phosphoprotein 1                                                | 0.002506207 | 2.02                |
| 201058_s_at  | <i>MYL9</i>    | Myosin, light chain 9, regulatory                                        | 9.1293E-05  | 2.15                |
| 201147_s_at  | <i>TIMP3</i>   | TIMP metalloproteinase inhibitor 3                                       | 1.4351E-05  | 2.15                |
| 201150_s_at  | <i>TIMP3</i>   | TIMP metalloproteinase inhibitor 3                                       | 1.77334E-05 | 2.03                |
| 201289_at    | <i>CYR61</i>   | Cysteine-rich, angiogenic inducer, 61                                    | 1.33434E-06 | 2.67                |
| 201496_x_at  | <i>MYH11</i>   | Myosin, heavy chain 11, smooth muscle                                    | 0.000639767 | 2.02                |
| 201645_at    | <i>TNC</i>     | Tenascin C                                                               | 0.000236339 | 2.29                |
| 201792_at    | <i>AEBP1</i>   | AE binding protein 1                                                     | 6.8465E-05  | 2.03                |
| 202237_at    | <i>NNMT</i>    | Nicotinamide N-methyltransferase                                         | 2.57535E-05 | 2.15                |
| 202274_at    | <i>ACTG2</i>   | Actin, gamma 2, smooth muscle, enteric                                   | 7.506E-05   | 2.03                |
| 202291_s_at  | <i>MGP</i>     | Matrix GLA protein                                                       | 1.93448E-05 | 2.77                |
| 202310_s_at  | <i>COL1A1</i>  | Collagen, type I, alpha 1                                                | 0.001917905 | 2.05                |
| 202311_s_at  | <i>COL1A1</i>  | Collagen, type I, alpha 1                                                | 0.002116429 | 2.09                |
| 202363_at    | <i>SPOCK1</i>  | Sparc/osteonectin, cwcv and kazal-like domains proteoglycan (testican) 1 | 3.37525E-05 | 2.19                |
| 202437_s_at  | <i>CYP1B1</i>  | Cytochrome P450, family 1, subfamily B, polypeptide 1                    | 0.001662327 | 2.11                |
| 202498_s_at  | <i>SLC2A3</i>  | Solute carrier family 2 (facilitated glucose transporter), member 3      | 0.000122207 | 2.00                |
| 202499_s_at  | <i>SLC2A3</i>  | Solute carrier family 2 (facilitated glucose transporter), member 3      | 0.000238055 | 2.19                |
| 202672_s_at  | <i>ATF3</i>    | Activating transcription factor 3                                        | 2.47058E-05 | 2.02                |
| 202766_s_at  | <i>FBNI</i>    | Fibrillin 1                                                              | 5.74137E-05 | 2.08                |
| 202988_s_at  | <i>RGS1</i>    | Regulator of G-protein signaling 1                                       | 1.81321E-09 | 2.97                |
| 203083_at    | <i>THBS2</i>   | Thrombospondin 2                                                         | 5.10405E-05 | 2.70                |
| 204051_s_at  | <i>SFRP4</i>   | Secreted frizzled-related protein 4                                      | 1.8344E-07  | 3.83                |
| 204052_s_at  | <i>SFRP4</i>   | Secreted frizzled-related protein 4                                      | 2.86372E-07 | 3.32                |
| 204457_s_at  | <i>GAS1</i>    | Growth arrest-specific 1                                                 | 0.000455298 | 2.82                |
| 204472_at    | <i>GEM</i>     | GTP binding protein overexpressed in skeletal muscle                     | 4.61815E-08 | 2.50                |
| 204622_x_at  | <i>NR4A2</i>   | Nuclear receptor subfamily 4, group A, member 2                          | 2.35455E-05 | 2.13                |
| 204939_s_at  | <i>PLN</i>     | Phospholamban                                                            | 5.48691E-05 | 2.10                |
| 204940_at    | <i>PLN</i>     | Phospholamban                                                            | 5.82032E-05 | 2.11                |
| 205422_s_at  | <i>ITGBL1</i>  | Integrin, beta-like 1 (with EGF-like repeat domains)                     | 1.29825E-05 | 2.91                |
| 205547_s_at  | <i>TAGLN</i>   | Transgelin                                                               | 0.000109081 | 2.26                |
| 205713_s_at  | <i>COMP</i>    | Cartilage oligomeric matrix protein                                      | 1.01742E-05 | 2.48                |
| 205941_s_at  | <i>COL10A1</i> | Collagen, type X, alpha 1                                                | 9.47934E-05 | 2.38                |
| 206224_at    | <i>CST1</i>    | Cystatin SN                                                              | 0.004959398 | 2.06                |
| 206577_at    | <i>VIP</i>     | Vasoactive intestinal peptide                                            | 0.002985188 | 2.10                |

| Probe ID    | Gene             | Protein                                                   | p-value     | Proportional change |
|-------------|------------------|-----------------------------------------------------------|-------------|---------------------|
| 207173_x_at | <i>CDH11</i>     | Cadherin 11, type 2, OB-cadherin (osteoblast)             | 8.60461E-05 | 2.06                |
| 209875_s_at | <i>SPP1</i>      | Secreted phosphoprotein 1                                 | 0.001536153 | 2.74                |
| 210004_at   | <i>OLRI</i>      | Oxidized low density lipoprotein (lectin-like) receptor 1 | 0.000130964 | 2.09                |
| 210511_s_at | <i>INHBA</i>     | Inhibin, beta A                                           | 2.07614E-05 | 2.44                |
| 210517_s_at | <i>AKAP12</i>    | A kinase (PRKA) anchor protein 12                         | 1.56563E-05 | 2.04                |
| 210764_s_at | <i>CYR61</i>     | Cysteine-rich, angiogenic inducer, 61                     | 2.62979E-06 | 2.40                |
| 211122_s_at | <i>CXCL11</i>    | Chemokine (C-X-C motif) ligand 11                         | 0.006808687 | 2.10                |
| 212344_at   | <i>SULF1</i>     | Sulfatase 1                                               | 2.89487E-05 | 2.21                |
| 212353_at   | <i>SULF1</i>     | Sulfatase 1                                               | 9.09842E-06 | 2.64                |
| 212354_at   | <i>SULF1</i>     | Sulfatase 1                                               | 1.30312E-05 | 2.41                |
| 213905_x_at | <i>BGN</i>       | Biglycan                                                  | 0.000330535 | 2.05                |
| 213943_at   | <i>TWIST1</i>    | Twist homolog 1 (Drosophila)                              | 8.58632E-05 | 2.25                |
| 215033_at   | <i>TM4SF1</i>    | Transmembrane 4 L six family member 1                     | 1.2279E-08  | 2.04                |
| 215646_s_at | <i>VCAN</i>      | Versican                                                  | 0.000677785 | 2.17                |
| 216005_at   | <i>TNC</i>       | Tenascin C                                                | 4.03919E-05 | 2.39                |
| 216248_s_at | <i>NR4A2</i>     | Nuclear receptor subfamily 4, group A, member 2           | 1.26792E-05 | 2.29                |
| 216834_at   | <i>RGS1</i>      | Regulator of G-protein signaling 1                        | 3.05537E-09 | 2.68                |
| 217428_s_at | <i>COL10A1</i>   | Collagen, type X, alpha 1                                 | 0.000123852 | 3.64                |
| 218468_s_at | <i>GREM1</i>     | Gremlin 1                                                 | 0.000227583 | 2.72                |
| 218469_at   | <i>GREM1</i>     | Gremlin 1                                                 | 0.0003666   | 2.59                |
| 219087_at   | <i>ASPN</i>      | Asporin                                                   | 2.23181E-05 | 2.92                |
| 221730_at   | <i>COL5A2</i>    | Collagen, type V, alpha 2                                 | 0.000692635 | 2.01                |
| 221748_s_at | <i>TNS1</i>      | Tensin 1                                                  | 0.000133411 | 2.03                |
| 222877_at   | ---              | ---                                                       | 1.4318E-06  | 2.14                |
| 223121_s_at | <i>SFRP2</i>     | Secreted frizzled-related protein 2                       | 0.000178028 | 2.59                |
| 223122_s_at | <i>SFRP2</i>     | Secreted frizzled-related protein 2                       | 9.3884E-05  | 3.20                |
| 223475_at   | <i>CRISPLD1</i>  | Cysteine-rich secretory protein LCCL domain containing 1  | 1.07185E-05 | 2.17                |
| 224396_s_at | <i>ASPN</i>      | Asporin                                                   | 6.15766E-06 | 2.54                |
| 224694_at   | <i>ANTXR1</i>    | Anthrax toxin receptor 1                                  | 0.000102969 | 2.25                |
| 225381_at   | <i>LOC399959</i> | Hypothetical LOC399959                                    | 4.40169E-05 | 2.44                |
| 225481_at   | <i>FRMD6</i>     | FERM domain containing 6                                  | 2.27148E-05 | 2.02                |
| 225664_at   | <i>COL12A1</i>   | Collagen, type XII, alpha 1                               | 0.000310454 | 2.18                |
| 225681_at   | <i>CTHRC1</i>    | Collagen triple helix repeat containing 1                 | 7.13833E-05 | 2.79                |
| 225762_x_at | <i>LOC284801</i> | Hypothetical protein LOC284801                            | 1.00682E-12 | 2.54                |
| 225767_at   | <i>LOC284801</i> | Hypothetical protein LOC284801                            | 7.6829E-15  | 4.02                |
| 225782_at   | <i>MSRB3</i>     | Methionine sulfoxide reductase B3                         | 0.00035065  | 2.01                |
| 226237_at   | <i>COL8A1</i>    | Collagen, type VIII, alpha 1                              | 9.79999E-06 | 3.10                |
| 226777_at   | <i>ADAM12</i>    | ADAM metallopeptidase domain 12                           | 0.00044622  | 2.28                |
| 226930_at   | <i>FNDC1</i>     | Fibronectin type III domain containing 1                  | 2.64629E-06 | 3.01                |
| 227099_s_at | <i>C11orf96</i>  | Chromosome 11 open reading frame 96                       | 1.68701E-06 | 2.48                |
| 227140_at   | <i>INHBA</i>     | Inhibin, beta A                                           | 4.01738E-05 | 2.97                |

| Probe ID     | Gene                 | Protein                                                                | p-value                    | Proportional change |
|--------------|----------------------|------------------------------------------------------------------------|----------------------------|---------------------|
| 227235_at    | <i>GUCY1A3</i>       | Guanylate cyclase 1, soluble, alpha 3                                  | 7.34799E-05                | 2.11                |
| 227399_at    | <i>VGLL3</i>         | Vestigial like 3 (Drosophila)                                          | 0.000940894                | 2.06                |
| 227566_at    | <i>NTM</i>           | Neurotrimin                                                            | 8.58912E-05                | 2.26                |
| 227697_at    | <i>SOCS3</i>         | Suppressor of cytokine signaling 3                                     | 0.000574813                | 2.07                |
| 228202_at    | <i>PLN</i>           | Phospholamban                                                          | 3.4219E-05                 | 2.35                |
| 228640_at    | <i>PCDH7</i>         | Protocadherin 7                                                        | 0.000418283                | 2.04                |
| 229271_x_at  | <i>COL11A1</i>       | Collagen, type XI, alpha 1                                             | 0.000948907                | 2.06                |
| 229554_at    | ---                  | ---                                                                    | 0.000145241                | 2.17                |
| 229802_at    | ---                  | ---                                                                    | 0.000922503                | 2.00                |
| 230493_at    | <i>SHISA2</i>        | Shisa homolog 2 ( <i>Xenopus laevis</i> )                              | 0.000179494                | 2.01                |
| 231766_s_at  | <i>COL12A1</i>       | Collagen, type XII, alpha 1                                            | 0.000379392                | 2.28                |
| 231879_at    | <i>COL12A1</i>       | Collagen, type XII, alpha 1                                            | 0.000216652                | 2.29                |
| 232113_at    | ---                  | ---                                                                    | 3.02703E-05                | 2.39                |
| 235944_at    | <i>HMCN1</i>         | Hemicentin 1                                                           | 7.63204E-06                | 2.17                |
| 236179_at    | <i>CDH11</i>         | Cadherin 11, type 2, OB-cadherin (osteoblast)                          | 8.87507E-05                | 2.35                |
| 238481_at    | <i>MGP</i>           | Matrix GLA protein                                                     | 1.18316E-06                | 2.53                |
| 238623_at    | ---                  | ---                                                                    | 1.04654E-06                | 2.44                |
| 37892_at     | <i>COL11A1</i>       | Collagen, type XI, alpha 1                                             | 0.000101146                | 2.79                |
| 1553828_at   | <i>FAM55A</i>        | Family with sequence similarity 55, member A                           | 0.000633162                | -2.06               |
| 1554436_a_at | <i>REG4</i>          | Regenerating islet-derived family, member 4                            | 0.028007727                | -2.52               |
| 1555962_at   | <i>B3GNT7</i>        | UDP-GlcNAc:betaGal<br>acetylglucosaminyltransferase 7                  | beta-1,3-N-<br>0.000795644 | -2.54               |
| 1555963_x_at | <i>B3GNT7</i>        | UDP-GlcNAc:betaGal<br>acetylglucosaminyltransferase 7                  | beta-1,3-N-<br>0.000789723 | -2.87               |
| 203240_at    | <i>FCGBP</i>         | Fc fragment of IgG binding protein                                     | 0.002948685                | -2.90               |
| 203649_s_at  | <i>PLA2G2A</i>       | Phospholipase A2, group IIA (platelets, synovial fluid)                | 0.003760504                | -2.42               |
| 203691_at    | <i>PI3</i>           | Peptidase inhibitor 3, skin-derived                                    | 0.002462861                | -2.10               |
| 203908_at    | <i>SLC4A4</i>        | Solute carrier family 4, sodium bicarbonate<br>cotransporter, member 4 | 0.000983189                | -3.03               |
| 204018_x_at  | <i>HBA1 /// HBA2</i> | Hemoglobin, alpha 1 /// hemoglobin, alpha 2                            | 0.000119014                | -2.03               |
| 204213_at    | <i>PIGR</i>          | Polymeric immunoglobulin receptor                                      | 0.000398215                | -2.70               |
| 204673_at    | <i>MUC2</i>          | Mucin 2, oligomeric mucus/gel-forming                                  | 0.005678468                | -2.64               |
| 204818_at    | <i>HSD17B2</i>       | Hydroxysteroid (17-beta) dehydrogenase 2                               | 0.000119211                | -2.26               |
| 205097_at    | <i>SLC26A2</i>       | Solute carrier family 26 (sulfate transporter), member 2               | 0.002478216                | -2.39               |
| 205185_at    | <i>SPINK5</i>        | Serine peptidase inhibitor, Kazal type 5                               | 5.58358E-05                | -2.29               |
| 205892_s_at  | <i>FABP1</i>         | Fatty acid binding protein 1, liver                                    | 0.032075593                | -2.35               |
| 205950_s_at  | <i>CA1</i>           | Carbonic anhydrase I                                                   | 2.96487E-05                | -3.66               |
| 205979_at    | <i>SCGB2A1</i>       | Secretoglobulin, family 2A, member 1                                   | 0.000787599                | -2.38               |
| 206000_at    | <i>MEP1A</i>         | Mepirin A, alpha (PABA peptide hydrolase)                              | 0.006828159                | -2.10               |
| 206143_at    | <i>SLC26A3</i>       | Solute carrier family 26, member 3                                     | 0.002087168                | -4.31               |
| 206198_s_at  | <i>CEACAM7</i>       | Carcinoembryonic antigen-related cell<br>adhesion molecule 7           | 0.000743488                | -3.77               |
| 206199_at    | <i>CEACAM7</i>       | Carcinoembryonic antigen-related cell<br>adhesion molecule 7           | 0.000617427                | -3.11               |
| 206208_at    | <i>CA4</i>           | Carbonic anhydrase IV                                                  | 0.000142793                | -2.22               |

| Probe ID    | Gene                  | Protein                                                                                   | p-value     | Proportional change |
|-------------|-----------------------|-------------------------------------------------------------------------------------------|-------------|---------------------|
| 206209_s_at | <i>CA4</i>            | Carbonic anhydrase IV                                                                     | 5.04159E-05 | -2.98               |
| 206262_at   | <i>ADH1C</i>          | Alcohol dehydrogenase 1C (class I), gamma polypeptide                                     | 5.40013E-05 | -3.66               |
| 206268_at   | <i>LEFTY1</i>         | Left-right determination factor 1                                                         | 0.018432403 | -2.25               |
| 206561_s_at | <i>AKR1B10</i>        | Aldo-keto reductase family 1, member B10 (aldose reductase)                               | 0.000169098 | -2.19               |
| 206641_at   | <i>TNFRSF17</i>       | Tumor necrosis factor receptor superfamily, member 17                                     | 7.48607E-05 | -2.02               |
| 206664_at   | <i>SI</i>             | Sucrase-isomaltase (alpha-glucosidase)                                                    | 9.10874E-05 | -5.30               |
| 207003_at   | <i>GUCA2A</i>         | Guanylate cyclase activator 2A (guanylin)                                                 | 2.67886E-05 | -2.88               |
| 207214_at   | <i>SPINK4</i>         | Serine peptidase inhibitor, Kazal type 4                                                  | 0.006152697 | -2.96               |
| 207245_at   | <i>UGT2B17</i>        | UDP glucuronosyltransferase 2 family, polypeptide B17                                     | 0.002178709 | -3.43               |
| 208450_at   | <i>LGALS2</i>         | Lectin, galactoside-binding, soluble, 2                                                   | 1.96728E-05 | -2.58               |
| 209116_x_at | <i>HBB</i>            | Hemoglobin, beta                                                                          | 2.82831E-05 | -2.46               |
| 209301_at   | <i>CA2</i>            | Carbonic anhydrase II                                                                     | 0.000491151 | -2.82               |
| 209374_s_at | <i>IGHM</i>           | Immunoglobulin heavy constant mu                                                          | 0.002618513 | -2.23               |
| 209458_x_at | <i>HBA1 /// HBA2</i>  | Hemoglobin, alpha 1 /// hemoglobin, alpha 2                                               | 9.34895E-05 | -2.12               |
| 209613_s_at | <i>ADH1B</i>          | Alcohol dehydrogenase 1B (class I), beta polypeptide                                      | 0.006916787 | -2.22               |
| 210107_at   | <i>CLCA1</i>          | Chloride channel accessory 1                                                              | 0.000416754 | -4.22               |
| 210738_s_at | <i>SLC4A4</i>         | Solute carrier family 4, sodium bicarbonate cotransporter, member 4                       | 0.000383647 | -2.11               |
| 211696_x_at | <i>HBB</i>            | Hemoglobin, beta                                                                          | 1.18856E-05 | -2.30               |
| 211699_x_at | <i>HBA1 /// HBA2</i>  | Hemoglobin, alpha 1 /// hemoglobin, alpha 2                                               | 0.000128052 | -2.02               |
| 211745_x_at | <i>HBA1 /// HBA2</i>  | Hemoglobin, alpha 1 /// hemoglobin, alpha 2                                               | 8.1156E-05  | -2.16               |
| 211848_s_at | <i>CEACAM7</i>        | Carcinoembryonic antigen-related cell adhesion molecule 7                                 | 0.000588658 | -3.12               |
| 212531_at   | <i>LCN2</i>           | Lipocalin 2                                                                               | 0.002337585 | -2.20               |
| 212592_at   | <i>IGJ</i>            | Immunoglobulin J polypeptide, linker protein for immunoglobulin alpha and mu polypeptides | 0.000180401 | -3.69               |
| 212768_s_at | <i>OLFM4</i>          | Olfactomedin 4                                                                            | 0.001184695 | -4.23               |
| 214142_at   | <i>ZG16</i>           | Zymogen granule protein 16 homolog (rat)                                                  | 0.000149205 | -4.79               |
| 214414_x_at | <i>HBA1 /// HBA2</i>  | Hemoglobin, alpha 1 /// hemoglobin, alpha 2                                               | 2.72256E-05 | -2.47               |
| 214433_s_at | <i>SELENBP1</i>       | Selenium binding protein 1                                                                | 0.000985865 | -2.04               |
| 214598_at   | <i>CLDN8</i>          | Claudin 8                                                                                 | 1.78118E-05 | -4.17               |
| 215657_at   | <i>SLC26A3</i>        | Solute carrier family 26, member 3                                                        | 0.008000304 | -2.03               |
| 217022_s_at | <i>IGHA1 /// IGH2</i> | Immunoglobulin heavy constant alpha 1 /// immunoglobulin heavy                            | 0.000214466 | -3.22               |
|             | <i>LOC100126583</i>   | /// hypothetical LOC100126583                                                             |             |                     |
| 217109_at   | <i>MUC4</i>           | Mucin 4, cell surface associated                                                          | 0.000620192 | -2.84               |
| 217110_s_at | <i>MUC4</i>           | Mucin 4, cell surface associated                                                          | 0.000989039 | -2.48               |
| 217232_x_at | <i>HBB</i>            | Hemoglobin, beta                                                                          | 2.09662E-05 | -2.04               |
| 217414_x_at | <i>HBA1 /// HBA2</i>  | Hemoglobin, alpha 1 /// hemoglobin, alpha 2                                               | 5.94249E-05 | -2.17               |
| 217546_at   | <i>MT1M</i>           | Metallothionein 1M                                                                        | 0.002091263 | -2.47               |
| 219727_at   | <i>DUOX2</i>          | Dual oxidase 2                                                                            | 0.000497377 | -2.84               |
| 219795_at   | <i>SLC6A14</i>        | Solute carrier family 6 (amino acid transporter), member 14                               | 0.010883367 | -2.29               |
| 219948_x_at | <i>UGT2A3</i>         | UDP glucuronosyltransferase 2 family, polypeptide A3                                      | 0.001187812 | -3.07               |
| 220026_at   | <i>CLCA4</i>          | Chloride channel accessory 4                                                              | 4.4668E-05  | -5.04               |

| Probe ID    | Gene              | Protein                                                            | p-value     | Proportional change |
|-------------|-------------------|--------------------------------------------------------------------|-------------|---------------------|
| 220376_at   | <i>LRRC19</i>     | Leucine rich repeat containing 19                                  | 0.001283828 | -2.46               |
| 220834_at   | <i>MS4A12</i>     | Membrane-spanning 4-domains, subfamily A, member 12                | 1.03895E-05 | -4.65               |
| 223447_at   | <i>REG4</i>       | Regenerating islet-derived family, member 4                        | 0.027839534 | -2.23               |
| 223597_at   | <i>ITLN1</i>      | Intelectin 1 (galactofuranose binding)                             | 0.000148222 | -4.89               |
| 224027_at   | <i>CCL28</i>      | Chemokine (C-C motif) ligand 28                                    | 4.55114E-05 | -2.27               |
| 224412_s_at | <i>TRPM6</i>      | Transient receptor potential cation channel, subfamily M, member 6 | 0.000748472 | -2.26               |
| 224959_at   | <i>SLC26A2</i>    | Solute carrier family 26 (sulfate transporter), member 2           | 0.004868048 | -2.10               |
| 224963_at   | <i>SLC26A2</i>    | Solute carrier family 26 (sulfate transporter), member 2           | 0.002598016 | -2.08               |
| 226147_s_at | <i>PIGR</i>       | Polymeric immunoglobulin receptor                                  | 0.01084721  | -2.54               |
| 226654_at   | <i>MUC12</i>      | Mucin 12, cell surface associated                                  | 0.009193088 | -2.03               |
| 227725_at   | <i>ST6GALNAC1</i> | ST6 (alpha-N-acetyl-neuraminy-2,3-beta-galactosyl-1,3              | 0.004737468 | -2.06               |
| 227735_s_at | <i>C10orf99</i>   | Chromosome 10 open reading frame 99                                | 0.004911848 | -2.04               |
| 227736_at   | <i>C10orf99</i>   | Chromosome 10 open reading frame 99                                | 0.00861509  | -2.22               |
| 228232_s_at | <i>VSIG2</i>      | V-set and immunoglobulin domain containing 2                       | 0.000105191 | -2.57               |
| 228241_at   | <i>AGR3</i>       | Anterior gradient homolog 3 ( <i>Xenopus laevis</i> )              | 0.023109441 | -2.16               |
| 229070_at   | <i>C6orf105</i>   | Chromosome 6 open reading frame 105                                | 9.90567E-06 | -3.45               |
| 229254_at   | <i>MFSD4</i>      | Major facilitator superfamily domain containing 4                  | 0.003950209 | -2.16               |
| 234632_x_at | ---               | ---                                                                | 0.000302489 | -2.79               |
| 238143_at   | <i>LOC646627</i>  | Phospholipase inhibitor                                            | 0.001739348 | -2.10               |
| 238750_at   | <i>CCL28</i>      | Chemokine (C-C motif) ligand 28                                    | 7.86416E-05 | -2.43               |
| 239673_at   | ---               | ---                                                                | 0.000459064 | -2.00               |
| 242601_at   | <i>HEPACAM2</i>   | HEPACAM family member 2                                            | 0.001268202 | -3.43               |

**Supplementary Table 4:** Differentially expressed genes in colon tumor tissue according to a comparison of timepoint. P-values represent the comparison between tissue obtained presurgery and 45 minutes after resection; the 332 regulated genes with  $\geq 2$ -fold (statistically significant) change in expression are listed.

| Probe ID     | Gene                          | Protein                                                             | P-value     | Proportional change |
|--------------|-------------------------------|---------------------------------------------------------------------|-------------|---------------------|
| 1552309_a_at | <i>NEXN</i>                   | Nexilin (F actin binding protein)                                   | 8.64128E-07 | 2.21                |
| 1554018_at   | <i>GPNMB</i>                  | Glycoprotein (transmembrane) nmb                                    | 5.28765E-06 | 2.18                |
| 1554741_s_at | <i>FGF7</i> /// <i>KGFLP1</i> | Fibroblast growth factor 7 /// keratinocyte growth factor-protein 1 | 0.000151345 | 2.18                |
|              | /// <i>KGFLP2</i>             | /// keratinocyte growth factor-like protein 2                       |             |                     |
| 1555229_a_at | <i>C1S</i>                    | Complement component 1, s subcomponent                              | 4.3929E-06  | 2.26                |
| 1555724_s_at | <i>TAGLN</i>                  | Transgelin                                                          | 6.24171E-07 | 2.86                |
| 1555778_a_at | <i>POSTN</i>                  | Periostin, osteoblast specific factor                               | 0.002106898 | 2.38                |
| 1556325_at   | <i>FILIP1</i>                 | Filamin A interacting protein 1                                     | 8.51026E-06 | 2.11                |
| 1568574_x_at | <i>SPPI</i>                   | Secreted phosphoprotein 1                                           | 1.022E-05   | 2.66                |
| 200986_at    | <i>SERPING1</i>               | Serpin peptidase inhibitor, clade G (C1 inhibitor), member 1        | 4.66163E-08 | 2.39                |
| 201041_s_at  | <i>DUSP1</i>                  | Dual specificity phosphatase 1                                      | 1.14772E-05 | 2.21                |
| 201058_s_at  | <i>MYL9</i>                   | Myosin, light chain 9, regulatory                                   | 2.00947E-06 | 2.92                |
| 201109_s_at  | <i>THBS1</i>                  | Thrombospondin 1                                                    | 3.33848E-06 | 2.16                |
| 201110_s_at  | <i>THBS1</i>                  | Thrombospondin 1                                                    | 5.94571E-06 | 2.19                |
| 201141_at    | <i>GPNMB</i>                  | Glycoprotein (transmembrane) nmb                                    | 1.30308E-06 | 2.30                |
| 201147_s_at  | <i>TIMP3</i>                  | TIMP metalloproteinase inhibitor 3                                  | 5.34657E-08 | 2.47                |
| 201150_s_at  | <i>TIMP3</i>                  | TIMP metalloproteinase inhibitor 3                                  | 3.1703E-08  | 2.37                |
| 201261_x_at  | <i>BGN</i>                    | Biglycan                                                            | 4.85485E-06 | 2.12                |
| 201289_at    | <i>CYR61</i>                  | Cysteine-rich, angiogenic inducer, 61                               | 3.96116E-08 | 3.01                |
| 201430_s_at  | <i>DPYSL3</i>                 | Dihydropyrimidinase-like 3                                          | 4.8262E-09  | 2.46                |
| 201431_s_at  | <i>DPYSL3</i>                 | Dihydropyrimidinase-like 3                                          | 1.33119E-08 | 2.41                |
| 201496_x_at  | <i>MYH11</i>                  | Myosin, heavy chain 11, smooth muscle                               | 4.17357E-06 | 3.59                |
| 201497_x_at  | <i>MYH11</i>                  | Myosin, heavy chain 11, smooth muscle                               | 6.93199E-06 | 2.78                |
| 201616_s_at  | <i>CALD1</i>                  | Caldesmon 1                                                         | 6.51618E-06 | 2.40                |
| 201617_x_at  | <i>CALD1</i>                  | Caldesmon 1                                                         | 2.0887E-05  | 2.27                |
| 201645_at    | <i>TNC</i>                    | Tenascin C                                                          | 5.77047E-06 | 2.80                |
| 201792_at    | <i>AEBP1</i>                  | AE binding protein 1                                                | 8.37051E-07 | 2.26                |
| 201842_s_at  | <i>EFEMP1</i>                 | EGF-containing fibulin-like extracellular matrix protein 1          | 1.49905E-05 | 2.29                |
| 201843_s_at  | <i>EFEMP1</i>                 | EGF-containing fibulin-like extracellular matrix protein 1          | 1.47168E-05 | 2.26                |
| 202133_at    | <i>WWTR1</i>                  | WW domain containing transcription regulator 1                      | 7.44281E-07 | 2.47                |
| 202207_at    | <i>ARLAC</i>                  | ADP-ribosylation factor-like 4C                                     | 6.6529E-09  | 2.25                |
| 202222_s_at  | <i>DES</i>                    | Desmin                                                              | 1.79349E-06 | 3.31                |
| 202237_at    | <i>NNMT</i>                   | Nicotinamide N-methyltransferase                                    | 5.67217E-07 | 2.66                |
| 202238_s_at  | <i>NNMT</i>                   | Nicotinamide N-methyltransferase                                    | 2.18919E-07 | 2.46                |
| 202274_at    | <i>ACTG2</i>                  | Actin, gamma 2, smooth muscle, enteric                              | 4.68424E-07 | 3.52                |
| 202291_s_at  | <i>MGP</i>                    | Matrix GLA protein                                                  | 6.19879E-07 | 3.62                |

| Probe ID    | Gene               | Protein                                                                                                                  | P-value     | Proportional change |
|-------------|--------------------|--------------------------------------------------------------------------------------------------------------------------|-------------|---------------------|
| 202310_s_at | <i>COL1A1</i>      | Collagen, type I, alpha 1                                                                                                | 0.000563428 | 2.20                |
| 202311_s_at | <i>COL1A1</i>      | Collagen, type I, alpha 1                                                                                                | 0.000616479 | 2.23                |
| 202363_at   | <i>SPOCK1</i>      | Sparc/osteonectin, cwcv and kazal-like domains proteoglycan (testican)                                                   | 4.23499E-08 | 2.97                |
| 202403_s_at | <i>COL1A2</i>      | Collagen, type I, alpha 2                                                                                                | 6.92721E-05 | 2.05                |
| 202404_s_at | <i>COL1A2</i>      | Collagen, type I, alpha 2                                                                                                | 0.000215944 | 2.03                |
| 202437_s_at | <i>CYP1B1</i>      | Cytochrome P450, family 1, subfamily B, polypeptide 1                                                                    | 7.75893E-06 | 3.21                |
| 202498_s_at | <i>SLC2A3</i>      | Solute carrier family 2 (facilitated glucose transporter), member 3                                                      | 5.8174E-06  | 2.26                |
| 202499_s_at | <i>SLC2A3</i>      | Solute carrier family 2 (facilitated glucose transporter), member 3                                                      | 4.31837E-06 | 2.70                |
| 202555_s_at | <i>MYLK</i>        | Myosin light chain kinase                                                                                                | 2.82138E-06 | 2.58                |
| 202628_s_at | <i>SERPINE1</i>    | Serp peptidase inhibitor, clade E (nexin, plasminogen activator )                                                        | 0.000116651 | 2.03                |
| 202766_s_at | <i>FBNI</i>        | Fibrillin 1                                                                                                              | 1.74402E-06 | 2.35                |
| 202988_s_at | <i>RGS1</i>        | Regulator of G-protein signaling 1                                                                                       | 7.61767E-12 | 3.77                |
| 203083_at   | <i>THBS2</i>       | Thrombospondin 2                                                                                                         | 1.97222E-06 | 3.01                |
| 203381_s_at | <i>APOE</i>        | Apolipoprotein E                                                                                                         | 6.47221E-06 | 2.02                |
| 203951_at   | <i>CNN1</i>        | Aalponin 1, basic, smooth muscle                                                                                         | 5.34586E-07 | 3.30                |
| 204030_s_at | <i>IQCJ-SCHIP1</i> | IQ motif containing J-schwannomin interacting protein 1 read-<br>/// <i>SCHIP1</i> /// schwannomin interacting protein 1 | 3.253E-08   | 2.21                |
| 204051_s_at | <i>SFRP4</i>       | Secreted frizzled-related protein 4                                                                                      | 8.23252E-10 | 4.55                |
| 204052_s_at | <i>SFRP4</i>       | Secreted frizzled-related protein 4                                                                                      | 9.92564E-10 | 3.99                |
| 204069_at   | <i>MEIS1</i>       | Meis homeobox 1                                                                                                          | 2.8713E-06  | 2.15                |
| 204083_s_at | <i>TPM2</i>        | Tropomyosin 2 (beta)                                                                                                     | 1.22293E-06 | 2.71                |
| 204135_at   | <i>FILIP1L</i>     | Filamin A interacting protein 1-like                                                                                     | 1.90475E-06 | 2.01                |
| 204457_s_at | <i>GAS1</i>        | Growth arrest-specific 1                                                                                                 | 1.60279E-05 | 3.75                |
| 204472_at   | <i>GEM</i>         | GTP binding protein overexpressed in skeletal muscle                                                                     | 6.16482E-11 | 2.98                |
| 204619_s_at | <i>VCAN</i>        | Versican                                                                                                                 | 1.80097E-05 | 2.21                |
| 204620_s_at | <i>VCAN</i>        | Versican                                                                                                                 | 3.28707E-05 | 2.17                |
| 204622_x_at | <i>NR4A2</i>       | Nuclear receptor subfamily 4, group A, member 2                                                                          | 4.15508E-05 | 2.11                |
| 204894_s_at | <i>AOC3</i>        | Amine oxidase, copper containing 3 (vascular adhesion protein 1)                                                         | 4.01865E-05 | 2.10                |
| 204938_s_at | <i>PLN</i>         | Phospholamban                                                                                                            | 4.08198E-06 | 3.30                |
| 204939_s_at | <i>PLN</i>         | Phospholamban                                                                                                            | 1.19057E-06 | 3.38                |
| 204940_at   | <i>PLN</i>         | Phospholamban                                                                                                            | 2.58764E-06 | 3.49                |
| 205422_s_at | <i>ITGBL1</i>      | Integrin, beta-like 1 (with EGF-like repeat domains)                                                                     | 1.09685E-07 | 3.62                |
| 205525_at   | <i>CALD1</i>       | Caldesmon 1                                                                                                              | 3.18885E-06 | 2.08                |
| 205547_s_at | <i>TAGLN</i>       | Transgelin                                                                                                               | 1.20093E-06 | 3.12                |
| 205549_at   | <i>PCP4</i>        | Purkinje cell protein 4                                                                                                  | 0.001902231 | 2.27                |
| 205713_s_at | <i>COMP</i>        | Cartilage oligomeric matrix protein                                                                                      | 2.80629E-09 | 2.83                |
| 205767_at   | <i>EREG</i>        | Epiregulin                                                                                                               | 0.015105334 | 2.02                |
| 205880_at   | <i>PRKD1</i>       | Protein kinase D1                                                                                                        | 4.49555E-07 | 2.02                |
| 205941_s_at | <i>COL10A1</i>     | Collagen, type X, alpha 1                                                                                                | 1.88032E-06 | 2.85                |
| 206025_s_at | <i>TNFAIP6</i>     | Tumor necrosis factor, alpha-induced protein 6                                                                           | 0.001039539 | 2.00                |



| <b>Probe ID</b> | <b>Gene</b>    | <b>Protein</b>                                            | <b>P-value</b> | <b>Proportional change</b> |
|-----------------|----------------|-----------------------------------------------------------|----------------|----------------------------|
| 206211_at       | <i>SELE</i>    | Selectin E                                                | 1.84189E-05    | 2.24                       |
| 206224_at       | <i>CST1</i>    | Cystatin SN                                               | 0.000510955    | 2.54                       |
| 206552_s_at     | <i>TAC1</i>    | Tachykinin, precursor 1                                   | 0.009523889    | 2.15                       |
| 206577_at       | <i>VIP</i>     | Vasoactive intestinal peptide                             | 0.000487317    | 2.57                       |
| 207173_x_at     | <i>CDH11</i>   | Cadherin 11, type 2, OB-cadherin (osteoblast)             | 1.13853E-06    | 2.33                       |
| 207191_s_at     | <i>ISLR</i>    | Immunoglobulin superfamily containing leucine-rich repeat | 5.93722E-08    | 2.17                       |
| 208078_s_at     | <i>SIK1</i>    | Salt-inducible kinase 1                                   | 5.33998E-08    | 2.02                       |
| 208131_s_at     | <i>PTGIS</i>   | Prostaglandin I2 (prostaglyclin) synthase                 | 1.09137E-06    | 2.37                       |
| 208747_s_at     | <i>C1S</i>     | Complement component 1, s subcomponent                    | 6.15078E-06    | 2.03                       |
| 209101_at       | <i>CTGF</i>    | Connective tissue growth factor                           | 1.954E-07      | 2.36                       |
| 209209_s_at     | <i>FERMT2</i>  | Fermitin family member 2                                  | 5.19974E-06    | 2.09                       |
| 209210_s_at     | <i>FERMT2</i>  | Fermitin family member 2                                  | 5.32763E-06    | 2.24                       |
| 209335_at       | <i>DCN</i>     | Decorin                                                   | 0.000271945    | 2.11                       |
| 209469_at       | <i>GPM6A</i>   | Glycoprotein M6A                                          | 1.13583E-05    | 2.76                       |
| 209470_s_at     | <i>GPM6A</i>   | Glycoprotein M6A                                          | 2.60505E-05    | 2.41                       |
| 209656_s_at     | <i>TMEM47</i>  | Transmembrane protein 47                                  | 2.33312E-05    | 2.04                       |
| 209763_at       | <i>CHRD1</i>   | Chordin-like 1                                            | 1.87586E-05    | 2.10                       |
| 209875_s_at     | <i>SPP1</i>    | Secreted phosphoprotein 1                                 | 1.10445E-05    | 3.86                       |
| 210004_at       | <i>OLR1</i>    | Oxidized low density lipoprotein (lectin-like) receptor 1 | 1.40651E-06    | 2.56                       |
| 210163_at       | <i>CXCL11</i>  | Chemokine (C-X-C motif) ligand 11                         | 0.00413012     | 2.22                       |
| 210170_at       | <i>PDLIM3</i>  | PDZ and LIM domain 3                                      | 3.57639E-06    | 2.20                       |
| 210299_s_at     | <i>FHL1</i>    | Four and a half LIM domains 1                             | 0.000496099    | 2.08                       |
| 210302_s_at     | <i>MAB21L2</i> | Mab-21-like 2 (C. elegans)                                | 1.37063E-05    | 2.58                       |
| 210495_x_at     | <i>FNI</i>     | Fibronectin 1                                             | 0.000177182    | 2.17                       |
| 210511_s_at     | <i>INHBA</i>   | Inhibin, beta A                                           | 1.15757E-06    | 2.64                       |
| 210517_s_at     | <i>AKAP12</i>  | A kinase (PRKA) anchor protein 12                         | 1.34672E-06    | 2.32                       |
| 210764_s_at     | <i>CYR61</i>   | Cysteine-rich, angiogenic inducer, 61                     | 3.77349E-08    | 2.82                       |
| 210809_s_at     | <i>POSTN</i>   | Periostin, osteoblast specific factor                     | 0.004350075    | 2.01                       |
| 211122_s_at     | <i>CXCL11</i>  | Chemokine (C-X-C motif) ligand 11                         | 0.002741151    | 2.36                       |
| 211571_s_at     | <i>VCAN</i>    | Versican                                                  | 1.69458E-05    | 2.18                       |
| 211597_s_at     | <i>HOPX</i>    | HOP homeobox                                              | 3.29961E-06    | 2.70                       |
| 211719_x_at     | <i>FNI</i>     | Fibronectin 1                                             | 0.000199495    | 2.19                       |
| 211896_s_at     | <i>DCN</i>     | Decorin                                                   | 0.000239747    | 2.06                       |
| 212077_at       | <i>CALD1</i>   | Caldesmon 1                                               | 1.52964E-05    | 2.03                       |
| 212158_at       | <i>SDC2</i>    | Syndecan 2                                                | 3.17792E-06    | 2.02                       |
| 212344_at       | <i>SULF1</i>   | Sulfatase 1                                               | 6.40288E-08    | 2.68                       |
| 212353_at       | <i>SULF1</i>   | Sulfatase 1                                               | 1.53454E-07    | 3.21                       |
| 212354_at       | <i>SULF1</i>   | Sulfatase 1                                               | 4.32709E-08    | 2.98                       |
| 212464_s_at     | <i>FNI</i>     | Fibronectin 1                                             | 0.000150308    | 2.29                       |
| 212489_at       | <i>COL5A1</i>  | Collagen, type V, alpha 1                                 | 7.30323E-05    | 2.00                       |
| 212667_at       | <i>SPARC</i>   | Secreted protein, acidic, cysteine-rich (osteonectin)     | 1.81985E-05    | 2.10                       |

| Probe ID    | Gene                  | Protein                                                                        | P-value     | Proportional change |
|-------------|-----------------------|--------------------------------------------------------------------------------|-------------|---------------------|
| 212730_at   | <i>SYNM</i>           | Synemin, intermediate filament protein                                         | 1.15097E-06 | 3.38                |
| 212764_at   | <i>ZEB1</i>           | Zinc finger E-box binding homeobox 1                                           | 2.6995E-06  | 2.12                |
| 212992_at   | <i>AHNAK2</i>         | AHNAK nucleoprotein 2                                                          | 4.32502E-05 | 2.16                |
| 213068_at   | <i>DPT</i>            | Dermatopontin                                                                  | 2.8673E-05  | 2.03                |
| 213125_at   | <i>OLFML2B</i>        | Olfactomedin-like 2B                                                           | 2.52307E-06 | 2.07                |
| 213413_at   | <i>STON1</i>          | Stonin 1                                                                       | 1.97195E-06 | 2.01                |
| 213746_s_at | <i>FLNA</i>           | Filamin A, alpha                                                               | 3.12413E-06 | 2.10                |
| 213790_at   | <i>ADAM12</i>         | ADAM metallopeptidase domain 12                                                | 2.35778E-05 | 2.08                |
| 213905_x_at | <i>BGN</i>            | Biglycan                                                                       | 1.46184E-05 | 2.31                |
| 213943_at   | <i>TWIST1</i>         | Twist homolog 1 (Drosophila)                                                   | 2.0937E-06  | 2.62                |
| 214027_x_at | <i>DES /// FAM48A</i> | Desmin /// family with sequence similarity 48, member A                        | 3.58011E-06 | 2.08                |
| 215446_s_at | <i>LOX</i>            | Lysyl oxidase                                                                  | 0.00013411  | 2.14                |
| 215646_s_at | <i>VCAN</i>           | Versican                                                                       | 4.95198E-05 | 2.43                |
| 216005_at   | <i>TNC</i>            | Tenascin C                                                                     | 4.21167E-07 | 3.00                |
| 216248_s_at | <i>NR4A2</i>          | Nuclear receptor subfamily 4, group A, member 2                                | 3.34829E-05 | 2.25                |
| 216442_x_at | <i>FNI</i>            | Fibronectin 1                                                                  | 0.000155093 | 2.18                |
| 216834_at   | <i>RGS1</i>           | regulator of G-protein signaling 1                                             | 5.20161E-12 | 3.38                |
| 217428_s_at | <i>COL10A1</i>        | collagen, type X, alpha 1                                                      | 2.1723E-06  | 4.79                |
| 217762_s_at | <i>RAB31</i>          | RAB31, member RAS oncogene family                                              | 3.89597E-06 | 2.22                |
| 217763_s_at | <i>RAB31</i>          | RAB31, member RAS oncogene family                                              | 2.27983E-06 | 2.23                |
| 217764_s_at | <i>RAB31</i>          | RAB31, member RAS oncogene family                                              | 2.67713E-06 | 2.31                |
| 217767_at   | <i>C3</i>             | Complement component 3                                                         | 3.48531E-05 | 2.04                |
| 217967_s_at | <i>FAM129A</i>        | Family with sequence similarity 129, member A                                  | 8.2629E-05  | 2.02                |
| 218087_s_at | <i>SORBS1</i>         | Sorbin and SH3 domain containing 1                                             | 0.000359092 | 2.17                |
| 218468_s_at | <i>GREM1</i>          | Gremlin 1                                                                      | 6.57618E-05 | 2.80                |
| 218469_at   | <i>GREM1</i>          | Gremlin 1                                                                      | 3.60594E-05 | 2.79                |
| 219087_at   | <i>ASPN</i>           | Asporin                                                                        | 8.97706E-08 | 3.78                |
| 220088_at   | <i>C5ARI</i>          | Complement component 5a receptor 1                                             | 1.72055E-05 | 2.16                |
| 221667_s_at | <i>HSPB8</i>          | Heat shock 22kDa protein 8                                                     | 2.31999E-06 | 2.55                |
| 221729_at   | <i>COL5A2</i>         | Collagen, type V, alpha 2                                                      | 5.86389E-05 | 2.13                |
| 221730_at   | <i>COL5A2</i>         | Collagen, type V, alpha 2                                                      | 3.28293E-05 | 2.29                |
| 221731_x_at | <i>VCAN</i>           | Versican                                                                       | 2.21485E-05 | 2.14                |
| 221748_s_at | <i>TNS1</i>           | Tensin 1                                                                       | 2.42111E-06 | 2.80                |
| 222088_s_at | <i>SLC2A14</i>        | Solute carrier family 2 (facilitated glucose transporter), member 14           | 7.50757E-06 | 2.28                |
|             | <i>/// SLC2A3</i>     | <i>///</i> solute carrier family 2 (facilitated glucose transporter), member 3 |             |                     |
| 222108_at   | <i>AMIGO2</i>         | Adhesion molecule with Ig-like domain 2                                        | 1.40265E-05 | 2.06                |
| 222379_at   | <i>KCNE4</i>          | Potassium voltage-gated channel, Isk-related family, member 4                  | 6.92326E-07 | 2.14                |
| 222877_at   | ---                   | ---                                                                            | 8.94788E-09 | 2.70                |
| 223121_s_at | <i>SFRP2</i>          | Secreted frizzled-related protein 2                                            | 5.48205E-06 | 3.14                |
| 223122_s_at | <i>SFRP2</i>          | Secreted frizzled-related protein 2                                            | 2.4782E-06  | 4.10                |
| 223475_at   | <i>CRISPLD1</i>       | Cysteine-rich secretory protein LCCL domain containing 1                       | 5.93303E-08 | 2.39                |

| Probe ID    | Gene                | Protein                                                            | P-value     | Proportional change |
|-------------|---------------------|--------------------------------------------------------------------|-------------|---------------------|
| 224396_s_at | <i>ASPN</i>         | Asporin                                                            | 4.75282E-08 | 3.04                |
| 224560_at   | <i>TIMP2</i>        | TIMP metalloproteinase inhibitor 2                                 | 1.80999E-05 | 2.08                |
| 224694_at   | <i>ANTXR1</i>       | Anthrax toxin receptor 1                                           | 2.0635E-06  | 2.55                |
| 224823_at   | <i>MYLK</i>         | Myosin light chain kinase                                          | 2.47351E-05 | 2.31                |
| 225242_s_at | <i>CCDC80</i>       | Coiled-coil domain containing 80                                   | 9.22593E-06 | 2.15                |
| 225381_at   | <i>LOC399959</i>    | Hypothetical LOC399959                                             | 6.77882E-07 | 2.93                |
| 225481_at   | <i>FRMD6</i>        | FERM domain containing 6                                           | 1.90451E-06 | 2.28                |
| 225664_at   | <i>COL12A1</i>      | Collagen, type XII, alpha 1                                        | 4.09385E-05 | 2.36                |
| 225681_at   | <i>CTHRC1</i>       | Collagen triple helix repeat containing 1                          | 1.40753E-06 | 3.41                |
| 225688_s_at | <i>PHLDB2</i>       | Pleckstrin homology-like domain, family B, member 2                | 2.743E-05   | 2.11                |
| 225710_at   | <i>GNB4</i>         | Guanine nucleotide binding protein (G protein), beta polypeptide 4 | 5.4662E-07  | 2.02                |
| 225720_at   | <i>SYNPO2</i>       | Synaptopodin 2                                                     | 4.58445E-05 | 2.30                |
| 225762_x_at | <i>LOC284801</i>    | Hypothetical protein LOC284801                                     | 1.10206E-14 | 3.22                |
| 225767_at   | <i>LOC284801</i>    | Hypothetical protein LOC284801                                     | 2.5843E-18  | 5.37                |
| 225782_at   | <i>MSRB3</i>        | Methionine sulfoxide reductase B3                                  | 1.67805E-06 | 2.75                |
| 225790_at   | <i>MSRB3</i>        | Methionine sulfoxide reductase B3                                  | 1.71053E-06 | 2.32                |
| 225895_at   | <i>SYNPO2</i>       | Synaptopodin 2                                                     | 8.00071E-05 | 2.95                |
| 225946_at   | <i>RASSF8</i>       | Ras association (RalGDS/AF-6) domain family (N-terminal) member 8  | 7.28589E-08 | 2.22                |
| 226066_at   | <i>MITF</i>         | Microphthalmia-associated transcription factor                     | 6.72249E-07 | 2.18                |
| 226103_at   | <i>NEXN</i>         | Nexilin (F actin binding protein)                                  | 1.96854E-06 | 2.62                |
| 226237_at   | <i>COL8A1</i>       | Collagen, type VIII, alpha 1                                       | 4.10517E-07 | 3.44                |
| 226303_at   | <i>PGM5</i>         | Phosphoglucomutase 5                                               | 7.85843E-05 | 2.21                |
| 226311_at   | <i>ADAMTS2</i>      | ADAM metalloproteinase with thrombospondin type 1 motif, 2         | 4.69123E-05 | 2.18                |
| 226517_at   | <i>BCAT1</i>        | Branched chain amino-acid transaminase 1, cytosolic                | 2.52937E-05 | 2.06                |
| 226545_at   | <i>CD109</i>        | CD109 molecule                                                     | 2.82547E-05 | 2.16                |
| 226677_at   | <i>ZNF521</i>       | Zinc finger protein 521                                            | 7.80947E-07 | 2.09                |
| 226777_at   | <i>ADAM12</i>       | ADAM metalloproteinase domain 12                                   | 3.81694E-05 | 2.54                |
| 226834_at   | ---                 | ---                                                                | 6.25067E-05 | 2.03                |
| 226930_at   | <i>FNDC1</i>        | Fibronectin type III domain containing 1                           | 1.42194E-08 | 3.73                |
| 227061_at   | <i>LOC100506621</i> | Hypothetical LOC100506621                                          | 1.38888E-05 | 2.15                |
| 227099_s_at | <i>C11orf96</i>     | Chromosome 11 open reading frame 96                                | 2.4922E-08  | 2.90                |
| 227140_at   | <i>INHBA</i>        | Inhibin, beta A                                                    | 4.82673E-06 | 3.22                |
| 227235_at   | <i>GUCY1A3</i>      | Guanylate cyclase 1, soluble, alpha 3                              | 9.90574E-07 | 2.68                |
| 227236_at   | <i>TSPAN2</i>       | Tetraspanin 2                                                      | 1.15802E-07 | 2.14                |
| 227399_at   | <i>VGLL3</i>        | Vestigial like 3 ( <i>Drosophila</i> )                             | 2.88028E-05 | 2.37                |
| 227529_s_at | <i>AKAP12</i>       | A kinase (PRKA) anchor protein 12                                  | 1.63519E-06 | 2.38                |
| 227566_at   | <i>NTM</i>          | Neurotrimin                                                        | 3.275E-07   | 2.71                |
| 227623_at   | <i>CACNA2D1</i>     | Calcium channel, voltage-dependent, alpha 2/delta subunit 1        | 1.48825E-06 | 2.29                |
| 227662_at   | <i>SYNPO2</i>       | Synaptopodin 2                                                     | 0.000101105 | 2.92                |
| 227697_at   | <i>SOCS3</i>        | Suppressor of cytokine signaling 3                                 | 5.55613E-05 | 2.40                |
| 227826_s_at | ---                 | ---                                                                | 8.06379E-06 | 3.36                |

| Probe ID     | Gene                | Protein                                                              | P-value                    | Proportional change |
|--------------|---------------------|----------------------------------------------------------------------|----------------------------|---------------------|
| 227827_at    | ---                 | ---                                                                  | 4.25676E-06                | 3.76                |
| 228133_s_at  | <i>MYH11</i>        | Myosin, heavy chain 11, smooth muscle                                | 2.56294E-05                | 2.60                |
| 228186_s_at  | <i>RSPO3</i>        | R-spondin 3 homolog ( <i>Xenopus laevis</i> )                        | 4.02828E-06                | 2.01                |
| 228202_at    | <i>PLN</i>          | Phospholamban                                                        | 1.90113E-06                | 3.93                |
| 228640_at    | <i>PCDH7</i>        | Protocadherin 7                                                      | 7.0205E-06                 | 2.50                |
| 229218_at    | <i>COL1A2</i>       | Collagen, type I, alpha 2                                            | 9.85169E-06                | 2.08                |
| 229271_x_at  | <i>COL11A1</i>      | Collagen, type XI, alpha 1                                           | 1.03103E-05                | 2.32                |
| 229530_at    | <i>GUCY1A3</i>      | Guanylate cyclase 1, soluble, alpha 3                                | 1.16037E-06                | 2.25                |
| 229554_at    | ---                 | ---                                                                  | 1.15598E-05                | 2.32                |
| 229802_at    | ---                 | ---                                                                  | 3.6632E-05                 | 2.37                |
| 230493_at    | <i>SHISA2</i>       | Shisa homolog 2 ( <i>Xenopus laevis</i> )                            | 1.7547E-06                 | 2.18                |
| 230746_s_at  | <i>LOC100288985</i> | Hypothetical protein LOC100288985                                    | 2.98305E-07                | 2.10                |
| 231579_s_at  | <i>TIMP2</i>        | TIMP metalloproteinase inhibitor 2                                   | 2.79382E-05                | 2.07                |
| 231766_s_at  | <i>COL12A1</i>      | Collagen, type XII, alpha 1                                          | 6.96345E-05                | 2.43                |
| 231879_at    | <i>COL12A1</i>      | Collagen, type XII, alpha 1                                          | 5.57201E-05                | 2.38                |
| 232113_at    | ---                 | ---                                                                  | 2.88882E-07                | 2.62                |
| 232298_at    | <i>LOC401093</i>    | Hypothetical LOC401093                                               | 1.32384E-05                | 2.12                |
| 235183_at    | ---                 | ---                                                                  | 5.11894E-06                | 2.14                |
| 235944_at    | <i>HMCN1</i>        | Hemicentin 1                                                         | 2.89194E-07                | 2.50                |
| 236179_at    | <i>CDH11</i>        | Cadherin 11, type 2, OB-cadherin (osteoblast)                        | 2.58445E-06                | 2.56                |
| 236297_at    | ---                 | ---                                                                  | 1.96659E-07                | 2.21                |
| 238481_at    | <i>MGP</i>          | Matrix GLA protein                                                   | 4.22456E-08                | 3.17                |
| 238623_at    | ---                 | ---                                                                  | 1.99645E-08                | 2.74                |
| 32128_at     | <i>CCL18</i>        | Chemokine (C-C motif) ligand 18 (pulmonary and activation-regulated) | 8.52833E-05                | 2.53                |
| 37512_at     | <i>HSD17B6</i>      | Hydroxysteroid (17-beta) dehydrogenase 6 homolog (mouse)             | 6.80377E-06                | 2.28                |
| 37892_at     | <i>COL11A1</i>      | Collagen, type XI, alpha 1                                           | 9.41527E-07                | 3.34                |
| 1552365_at   | <i>SCIN</i>         | Scinderin                                                            | 0.001827943                | -2.11               |
| 1552502_s_at | <i>RHBDL2</i>       | Rhomboid, veinlet-like 2 ( <i>Drosophila</i> )                       | 2.55739E-06                | -2.14               |
| 1553828_at   | <i>FAM55A</i>       | Family with sequence similarity 55, member A                         | 2.91387E-05                | -2.48               |
| 1554436_a_at | <i>REG4</i>         | Regenerating islet-derived family, member 4                          | 0.000212951                | -5.23               |
| 1555962_at   | <i>B3GNT7</i>       | UDP-GlcNAc:betaGal<br>acetylglucosaminyltransferase 7                | beta-1,3-N-<br>7.154E-05   | -3.04               |
| 1555963_x_at | <i>B3GNT7</i>       | UDP-GlcNAc:betaGal<br>acetylglucosaminyltransferase 7                | beta-1,3-N-<br>9.15242E-05 | -3.38               |
| 203240_at    | <i>FCGBP</i>        | Fc fragment of IgG binding protein                                   | 4.78956E-05                | -4.30               |
| 203559_s_at  | <i>ABPI</i>         | Amiloride binding protein 1 [amine oxidase (copper-containing)]      | 7.27109E-07                | -2.20               |
| 203649_s_at  | <i>PLA2G2A</i>      | Phospholipase A2, group IIA (platelets, synovial fluid)              | 0.002158679                | -2.46               |
| 203691_at    | <i>PI3</i>          | Peptidase inhibitor 3, skin-derived                                  | 2.39096E-05                | -2.54               |
| 203908_at    | <i>SLC4A4</i>       | Solute carrier family 4, sodium bicarbonate cotransporter, member 4  | 1.09103E-05                | -4.34               |
| 204130_at    | <i>HSD11B2</i>      | Hydroxysteroid (11-beta) dehydrogenase 2                             | 3.28616E-06                | -2.02               |
| 204213_at    | <i>PIGR</i>         | Polymeric immunoglobulin receptor                                    | 3.18471E-05                | -3.53               |
| 204673_at    | <i>MUC2</i>         | Mucin 2, oligomeric mucus/gel-forming                                | 0.000154428                | -3.61               |

| Probe ID    | Gene                 | Protein                                                                                   | P-value     | Proportional change |
|-------------|----------------------|-------------------------------------------------------------------------------------------|-------------|---------------------|
| 204818_at   | <i>HSD17B2</i>       | Hydroxysteroid (17-beta) dehydrogenase 2                                                  | 1.61903E-05 | -2.56               |
| 204895_x_at | <i>MUC4</i>          | Mucin 4, cell surface associated                                                          | 4.95801E-05 | -2.17               |
| 205097_at   | <i>SLC26A2</i>       | Solute carrier family 26 (sulfate transporter), member 2                                  | 0.007081477 | -2.15               |
| 205185_at   | <i>SPINK5</i>        | Serine peptidase inhibitor, Kazal type 5                                                  | 1.51319E-05 | -2.36               |
| 205259_at   | <i>NR3C2</i>         | Nuclear receptor subfamily 3, group C, member 2                                           | 0.000364922 | -2.02               |
| 205825_at   | <i>PCSK1</i>         | Proprotein convertase subtilisin/kexin type 1                                             | 0.016576148 | -2.16               |
| 205950_s_at | <i>CA1</i>           | Carbonic anhydrase I                                                                      | 1.42429E-06 | -4.31               |
| 205979_at   | <i>SCGB2A1</i>       | Secretoglobin, family 2A, member 1                                                        | 2.41977E-05 | -3.04               |
| 206000_at   | <i>MEP1A</i>         | Meprin A, alpha (PABA peptide hydrolase)                                                  | 0.001001283 | -2.52               |
| 206143_at   | <i>SLC26A3</i>       | Solute carrier family 26, member 3                                                        | 0.00055994  | -4.58               |
| 206198_s_at | <i>CEACAM7</i>       | Carcinoembryonic antigen-related cell adhesion molecule 7                                 | 0.000346086 | -3.98               |
| 206199_at   | <i>CEACAM7</i>       | Carcinoembryonic antigen-related cell adhesion molecule 7                                 | 0.000404387 | -3.15               |
| 206208_at   | <i>CA4</i>           | Carbonic anhydrase IV                                                                     | 3.14437E-06 | -2.60               |
| 206209_s_at | <i>CA4</i>           | Carbonic anhydrase IV                                                                     | 9.1296E-07  | -3.60               |
| 206262_at   | <i>ADH1C</i>         | Alcohol dehydrogenase 1C (class I), gamma polypeptide                                     | 1.11801E-05 | -4.05               |
| 206268_at   | <i>LEFTY1</i>        | Left-right determination factor 1                                                         | 0.006935695 | -2.48               |
| 206561_s_at | <i>AKR1B10</i>       | Aldo-keto reductase family 1, member B10 (aldose reductase)                               | 0.000110476 | -2.30               |
| 206641_at   | <i>TNFRSF17</i>      | Tumor necrosis factor receptor superfamily, member 17                                     | 6.65093E-05 | -2.02               |
| 206664_at   | <i>SI</i>            | Sucrase-isomaltase (alpha-glucosidase)                                                    | 2.842E-07   | -8.14               |
| 207003_at   | <i>GUCA2A</i>        | Guanylate cyclase activator 2A (guanylin)                                                 | 1.76864E-06 | -3.34               |
| 207214_at   | <i>SPINK4</i>        | Serine peptidase inhibitor, Kazal type 4                                                  | 2.99566E-05 | -5.21               |
| 207222_at   | <i>PLA2G10</i>       | Phospholipase A2, group X                                                                 | 1.45449E-05 | -2.09               |
| 207245_at   | <i>UGT2B17</i>       | UDP glucuronosyltransferase 2 family, polypeptide B17                                     | 0.002842665 | -3.42               |
| 208450_at   | <i>LGALS2</i>        | Lectin, galactoside-binding, soluble, 2                                                   | 4.05288E-06 | -2.79               |
| 209116_x_at | <i>HBB</i>           | Hemoglobin, beta                                                                          | 2.37634E-05 | -2.60               |
| 209301_at   | <i>CA2</i>           | Carbonic anhydrase II                                                                     | 0.000136418 | -3.05               |
| 209458_x_at | <i>HBA1 /// HBA2</i> | Hemoglobin, alpha 1 /// hemoglobin, alpha 2                                               | 0.000257361 | -2.06               |
| 209613_s_at | <i>ADH1B</i>         | Alcohol dehydrogenase 1B (class I), beta polypeptide                                      | 0.016020505 | -2.04               |
| 209752_at   | <i>REG1A</i>         | Regenerating islet-derived 1 alpha                                                        | 0.042615985 | -2.28               |
| 210107_at   | <i>CLCA1</i>         | Chloride channel accessory 1                                                              | 9.72618E-07 | -7.23               |
| 210174_at   | <i>NR5A2</i>         | Nuclear receptor subfamily 5, group A, member 2                                           | 2.06347E-05 | -2.02               |
| 210738_s_at | <i>SLC4A4</i>        | Solute carrier family 4, sodium bicarbonate cotransporter, member 4                       | 7.18965E-05 | -2.30               |
| 211696_x_at | <i>HBB</i>           | Hemoglobin, beta                                                                          | 1.12554E-05 | -2.39               |
| 211699_x_at | <i>HBA1 /// HBA2</i> | Hemoglobin, alpha 1 /// hemoglobin, alpha 2                                               | 0.000153371 | -2.02               |
| 211745_x_at | <i>HBA1 /// HBA2</i> | Hemoglobin, alpha 1 /// hemoglobin, alpha 2                                               | 0.000163306 | -2.12               |
| 211848_s_at | <i>CEACAM7</i>       | Carcinoembryonic antigen-related cell adhesion molecule 7                                 | 0.000349566 | -3.17               |
| 212531_at   | <i>LCN2</i>          | Lipocalin 2                                                                               | 5.05852E-05 | -2.77               |
| 212592_at   | <i>IGJ</i>           | Immunoglobulin J polypeptide, linker protein for immunoglobulin alpha and mu polypeptides | 4.97675E-05 | -4.06               |
| 212768_s_at | <i>OLFM4</i>         | Olfactomedin 4                                                                            | 7.64335E-05 | -6.94               |
| 212814_at   | <i>AHCYL2</i>        | Adenosylhomocysteinase-like 2                                                             | 5.00094E-07 | -2.14               |
| 214142_at   | <i>ZG16</i>          | Zymogen granule protein 16 homolog (rat)                                                  | 6.0815E-07  | -7.33               |

| Probe ID    | Gene                          | Protein                                                                                      | P-value     | Proportional change |
|-------------|-------------------------------|----------------------------------------------------------------------------------------------|-------------|---------------------|
| 214414_x_at | <i>HBA1</i> /// <i>HBA2</i>   | Hemoglobin, alpha 1 /// hemoglobin, alpha 2                                                  | 4.54995E-05 | -2.49               |
| 214433_s_at | <i>SELENBP1</i>               | Selenium binding protein 1                                                                   | 4.2296E-05  | -2.33               |
| 214598_at   | <i>CLDN8</i>                  | Claudin 8                                                                                    | 1.80976E-06 | -4.81               |
| 215657_at   | <i>SLC26A3</i>                | Solute carrier family 26, member 3                                                           | 0.002370526 | -2.26               |
| 217022_s_at | <i>IGHA1</i> /// <i>IGHA2</i> | Immunoglobulin heavy constant alpha 1 /// immunoglobulin heavy constant alpha 2 (A2m marker) | 2.43669E-05 | -3.50               |
|             | <i>LOC100126583</i>           | /// hypothetical LOC100126583                                                                |             |                     |
| 217109_at   | <i>MUC4</i>                   | Mucin 4, cell surface associated                                                             | 1.35267E-05 | -3.86               |
| 217110_s_at | <i>MUC4</i>                   | Mucin 4, cell surface associated                                                             | 3.51375E-05 | -3.27               |
| 217232_x_at | <i>HBB</i>                    | Hemoglobin, beta                                                                             | 2.05507E-05 | -2.09               |
| 217238_s_at | <i>ALDOB</i>                  | Aldolase B, fructose-bisphosphate                                                            | 0.00142396  | -2.04               |
| 217414_x_at | <i>HBA1</i> /// <i>HBA2</i>   | Hemoglobin, alpha 1 /// hemoglobin, alpha 2                                                  | 0.000140008 | -2.10               |
| 217546_at   | <i>MT1M</i>                   | Metallothionein 1M                                                                           | 0.000408888 | -2.82               |
| 219014_at   | <i>PLAC8</i>                  | Placenta-specific 8                                                                          | 0.001224132 | -2.25               |
| 219727_at   | <i>DUOX2</i>                  | Dual oxidase 2                                                                               | 1.335E-05   | -3.53               |
| 219795_at   | <i>SLC6A14</i>                | Solute carrier family 6 (amino acid transporter), member 14                                  | 0.000316091 | -3.36               |
| 219948_x_at | <i>UGT2A3</i>                 | UDP glucuronosyltransferase 2 family, polypeptide A3                                         | 3.91209E-05 | -4.09               |
| 220026_at   | <i>CLCA4</i>                  | Chloride channel accessory 4                                                                 | 6.50973E-07 | -6.86               |
| 220030_at   | <i>STYK1</i>                  | Serine/threonine/tyrosine kinase 1                                                           | 3.96282E-06 | -2.35               |
| 220075_s_at | <i>CDHR5</i>                  | Cadherin-related family member 5                                                             | 2.10493E-05 | -2.43               |
| 220376_at   | <i>LRRC19</i>                 | Leucine rich repeat containing 19                                                            | 0.000233493 | -2.74               |
| 220645_at   | <i>FAM55D</i>                 | Family with sequence similarity 55, member D                                                 | 6.0041E-05  | -2.21               |
| 220812_s_at | <i>HHLA2</i>                  | HERV-H LTR-associating 2                                                                     | 1.4047E-06  | -2.09               |
| 220834_at   | <i>MS4A12</i>                 | Membrane-spanning 4-domains, subfamily A, member 12                                          | 1.79419E-06 | -5.32               |
| 221004_s_at | <i>ITM2C</i>                  | Integral membrane protein 2C                                                                 | 2.84249E-05 | -2.08               |
| 223447_at   | <i>REG4</i>                   | Regenerating islet-derived family, member 4                                                  | 0.000189189 | -4.21               |
| 223484_at   | <i>C15orf48</i>               | Chromosome 15 open reading frame 48                                                          | 1.34775E-05 | -2.09               |
| 223551_at   | <i>PKIB</i>                   | Protein kinase (cAMP-dependent, catalytic) inhibitor beta                                    | 0.001012167 | -2.33               |
| 223597_at   | <i>ITLN1</i>                  | Intelectin 1 (galactofuranose binding)                                                       | 1.9742E-07  | -8.23               |
| 223952_x_at | <i>DHRS9</i>                  | Dehydrogenase/reductase (SDR family) member 9                                                | 0.000600741 | -2.08               |
| 224009_x_at | <i>DHRS9</i>                  | Dehydrogenase/reductase (SDR family) member 9                                                | 0.000308104 | -2.35               |
| 224027_at   | <i>CCL28</i>                  | Chemokine (C-C motif) ligand 28                                                              | 6.04109E-07 | -2.63               |
| 224412_s_at | <i>TRPM6</i>                  | Transient receptor potential cation channel, subfamily M, member 6                           | 0.000220103 | -2.47               |
| 226147_s_at | <i>PIGR</i>                   | Polymeric immunoglobulin receptor                                                            | 0.00063626  | -3.95               |
| 226654_at   | <i>MUC12</i>                  | Mucin 12, cell surface associated                                                            | 0.001674357 | -2.36               |
| 226974_at   | <i>NEDD4L</i>                 | Neural precursor cell expressed, developmentally down-regulated 4-like                       | 4.62046E-06 | -2.10               |
| 227048_at   | <i>LAMA1</i>                  | Laminin, alpha 1                                                                             | 4.34789E-05 | -2.16               |
| 227725_at   | <i>ST6GALNAC1</i>             | ST6 (alpha-N-acetyl-neuraminyl-2,3-beta-galactosyl-1,3)                                      | 0.000642755 | -2.41               |
| 227735_s_at | <i>C10orf99</i>               | Chromosome 10 open reading frame 99                                                          | 0.001153096 | -2.28               |
| 227736_at   | <i>C10orf99</i>               | Chromosome 10 open reading frame 99                                                          | 0.003108923 | -2.40               |
| 228232_s_at | <i>VSIG2</i>                  | V-set and immunoglobulin domain containing 2                                                 | 4.10444E-06 | -3.08               |
| 228241_at   | <i>AGR3</i>                   | Anterior gradient homolog 3 ( <i>Xenopus laevis</i> )                                        | 0.00398137  | -2.60               |

| Probe ID    | Gene                | Protein                                                                | P-value     | Proportional change |
|-------------|---------------------|------------------------------------------------------------------------|-------------|---------------------|
| 229070_at   | <i>C6orf105</i>     | Chromosome 6 open reading frame 105                                    | 2.99495E-07 | -3.95               |
| 229254_at   | <i>MFSD4</i>        | Major facilitator superfamily domain containing 4                      | 6.75206E-05 | -2.83               |
| 229831_at   | <i>CNTN3</i>        | Contactin 3 (plasmacytoma associated)                                  | 0.000235636 | -2.11               |
| 234632_x_at | ---                 | ---                                                                    | 3.1752E-05  | -3.17               |
| 237530_at   | ---                 | ---                                                                    | 4.31807E-05 | -2.03               |
| 238143_at   | <i>LOC646627</i>    | Phospholipase inhibitor                                                | 0.000458742 | -2.28               |
| 238750_at   | <i>CCL28</i>        | Chemokine (C-C motif) ligand 28                                        | 1.24326E-06 | -2.94               |
| 238846_at   | <i>TNFRSF11A</i>    | Tumor necrosis factor receptor superfamily, member 11a, NFKB activator | 0.000256856 | -2.14               |
| 239370_at   | <i>LOC100505633</i> | Hypothetical LOC100505633                                              | 6.16647E-06 | -2.10               |
| 239673_at   | ---                 | ---                                                                    | 6.3915E-06  | -2.47               |
| 239994_at   | ---                 | ---                                                                    | 1.10317E-05 | -2.10               |
| 240856_at   | <i>GPR120</i>       | G protein-coupled receptor 120                                         | 0.000388776 | -2.03               |
| 241994_at   | <i>XDH</i>          | Xanthine dehydrogenase                                                 | 5.03297E-06 | -2.32               |
| 242601_at   | <i>HEPACAM2</i>     | HEPACAM family member 2                                                | 1.47154E-05 | -5.35               |
| 41469_at    | <i>PI3</i>          | Peptidase inhibitor 3, skin-derived                                    | 1.24208E-05 | -2.46               |

**Supplementary Table 5:** Distribution of partitions derived from hierarchical clustering of patients with primary colorectal carcinoma across different timepoints: pre, before hepatic pedicle clamping; post, after clamping; 10', 10 minutes after resection; 20', 20 minutes after resection; and 45', 45 minutes after resection.

| Partition       | Normal tissue                                                                                                                        | Tumor tissue                                                                       |
|-----------------|--------------------------------------------------------------------------------------------------------------------------------------|------------------------------------------------------------------------------------|
|                 | Patient no.                                                                                                                          | Patient no.                                                                        |
| Pre/10' 20' 45' | 2, 3, 4, 7, 8, 9, 10, 12, 13, 15, 16, 17, 18, 21, 22, 23, 25, 26, 27, 28, 30, 32, 33, 34, 35, 36, 37, 38, 39, 41, 42, 43, 46, 47, 48 | 2, 3, 4, 9, 10, 11, 12, 16, 17, 20, 21, 23, 26, 27, 29, 30, 32, 34, 36, 39, 40, 42 |
| Pre 10'/20' 45' | 11                                                                                                                                   | 7, 18, 43                                                                          |
| Pre 20'/10' 45' |                                                                                                                                      | 33, 41                                                                             |
| Pre 45'/10' 20' | 40                                                                                                                                   | 35, 46, 48                                                                         |
| 10'/pre 20' 45' | 5                                                                                                                                    | 22                                                                                 |
| 20'/pre 10' 45' | 20                                                                                                                                   | 5, 37, 28                                                                          |
| 45'/pre 10' 20' | 29                                                                                                                                   | 8, 13, 15, 25, 38, 47                                                              |
